# Supplementary material
Source: ML conference proceedings conference paper supplement (https://openreview.net/forum?id=ldXyNSvXEr)
Supplement: supplementary_material [file attachment]

---

# Optimal Aggregation of Prediction Intervals under Unsupervised Domain Shift

---

Anonymous Author(s)

Affiliation

Address

email

## Abstract

1 As machine learning models are increasingly deployed in dynamic environments,  
2 it becomes paramount to assess and quantify uncertainties associated with dis-  
3 tribution shifts. A distribution shift occurs when the underlying data-generating  
4 process changes, leading to a deviation in the model’s performance. The predic-  
5 tion interval, which captures the range of likely outcomes for a given prediction,  
6 serves as a crucial tool for characterizing uncertainties induced by their underlying  
7 distribution. In this paper, we propose methodologies for aggregating prediction  
8 intervals to obtain one with minimal width and adequate coverage on the target  
9 domain under unsupervised domain shift, under which we have labeled samples  
10 from a related source domain and unlabeled covariates from the target domain.  
11 Our analysis encompasses scenarios where the source and the target domain are  
12 related via i) a bounded density ratio, and ii) a measure-preserving transformation.  
13 Our proposed methodologies are computationally efficient and easy to implement.  
14 Beyond illustrating the performance of our method through a real-world dataset,  
15 we also delve into the theoretical details. This includes establishing rigorous theo-  
16 retical guarantees, coupled with finite sample bounds, regarding the coverage and  
17 width of our prediction intervals. Our approach excels in practical applications  
18 and is underpinned by a solid theoretical framework, ensuring its reliability and  
19 effectiveness across diverse contexts.

## 20 1 Introduction

21 In the modern era of big data and complex machine learning models, extensive data collected from  
22 diverse sources are often used to build a predictive model. However, the assumption of independent  
23 and identically distributed (i.i.d.) data is frequently violated in practical scenarios. Take algorithmic  
24 fairness as an example: historical data often exhibit sampling biases towards certain groups, like  
25 females being underrepresented in credit card data. Over time, the differences in group proportions  
26 have diminished, leading to distribution shifts. Consequently, models trained on historical data may  
27 face shifted distributions during testing, and proper adjustments is needed. Distribution shift has gar-  
28 nered significant attention from statistical and machine learning communities under various names,  
29 i.e., transfer learning (Pan and Yang, 2009; Weiss et al., 2016), domain adaptation (Farahani et al.,  
30 2021), domain generalization (Zhou et al., 2022; Wang et al., 2022), continual learning (De Lange  
31 et al., 2021; Mai et al., 2022), multitask learning (Zhang and Yang, 2021) etc. While numerous  
32 methods are available in the literature for training predictive models under distribution shift, uncer-  
33 tainty quantification under distribution shift has received relatively scant attention despite its crucial  
34 importance. One notable exception is conformal prediction under distribution shift; Tibshirani et al.  
35 (2019) proposed a variant of standard conformal inference methods to accommodate test data from  
36 a distinct distribution from the training data under the covariate shift. Recently, Gibbs and Candes  
37 (2021) introduced an adaptive conformal inference approach suitable for continuously changing dis-

tributions over time. Additionally, quantile regression under distribution shift offers another avenue for addressing uncertainty quantification under distribution shift (Eastwood et al., 2022).

Although few methods exist for constructing prediction intervals under distribution shift, most focus primarily on ensuring coverage guarantee rather than minimizing interval width. This prompts the immediate question: *Can we generate prediction intervals in the target domain that provide both i) coverage guarantee and ii) minimal width?* This paper seeks to address this question by leveraging model aggregation techniques. Suppose we have  $K$  different methods for constructing prediction intervals in the *source* domain. Our proposed approach efficiently combines these methods to produce prediction intervals in the *target* domain with adequate coverage and minimal width. When individual methods are the elementary basis functions, such as the kernel basis, the resulting aggregation is indeed a construction of the prediction interval based on the basis functions. Our methodology draws inspiration primarily from recent work (Fan et al., 2023) on prediction interval aggregation under the i.i.d. setting. However, a key distinction lies in our focus on *unsupervised domain adaptation*, where we can access labeled samples from the source and unlabeled samples from the target domain. Certain assumptions regarding the similarities between these domains are necessary to facilitate knowledge transfer from the source to the target domain. We explore two types of similarities in this paper: i) *covariate shift*, where we assume that the distribution of the response variable  $Y$  given  $X$  is consistent across both domains, albeit the distribution of  $X$  may differ, and ii) *domain shift*, where we assume that the conditional distribution of  $Y$  given  $X$  remains unchanged up to a measure-preserving transformation. Covariate shift is a well-explored concept in transfer learning and has also garnered attention in uncertainty quantification. It allows different distributions of  $X$  while maintaining identical conditional distributions  $Y|X$  across domains. For constructing conformal prediction intervals within this framework, see Tibshirani et al. (2019); Hu and Lei (2023); Yang et al. (2022); Lei and Candès (2021) and references therein. On the other hand, *distribution shift* is more general, allowing both the distribution of  $X$  and the conditional distribution of  $Y|X$  to differ across domains. Our methods in this context draw upon domain matching principles via transport map, as proposed in Courty et al. (2014) and further elaborated in subsequent works like Courty et al. (2016, 2017); Redko et al. (2017), among others. The key assumption is the existence of a measure-preserving/domain-aligning map  $T$  from the target to the source domain, such that the conditional distribution of  $Y|X$  on the target domain matches  $Y|T(X)$  on the source domain, i.e., conditional distributions matches upon domain alignment. The case where the domain-aligning map is the optimal transport map has received considerable attention in the literature, e.g., see Courty et al. (2014, 2016, 2017); Xu et al. (2020). Empirical evidence supports the efficacy of domain alignment through optimal transport maps across various datasets. For instance, in Xu et al. (2020), a variant of this method is applied for domain adaptation in image recognition tasks, such as recognizing similarities between USPS (Hull, 1994), MNIST (LeCun et al., 1998), and SVHN digit images (Netzer et al., 2011), as well as between different types of images in the Office-home dataset (Venkateswara et al., 2017), including artistic and product images. Additionally, in Courty et al. (2014), the authors explore the impact of domain alignment via optimal transport maps on the face recognition problem, where different poses give rise to distinct domains. However, most of these works concentrate on training predictors that perform well on the target domain without any guarantee regarding uncertainty quantification. To our knowledge, this is the first work to propose a method with rigorous theoretical guarantees for constructing prediction intervals on the target domain under the domain-aligning assumption within an unsupervised domain adaptation framework. We now summarize our contributions.

**Our Contributions:** This paper introduces a novel methodology for aggregating various prediction methods available on the source domain to construct a unified prediction interval on the target domain under both covariate shift and domain shift assumptions. Our approach is simple and easy to implement and requires solving a convex optimization problem, which can even be simplified to a linear program problem in certain scenarios. We also establish rigorous theoretical guarantees, presenting finite sample concentration bounds to demonstrate that our method achieves adequate coverage with a small width. Furthermore, our methodology extends beyond model aggregation; it can be used to construct efficient prediction intervals from any convex collection of candidate functions. In the paper, we adopt this broader perspective, discussing how the aggregation of prediction intervals emerges as a particular case. Lastly, we validate the effectiveness of our approach by analyzing a real-world dataset.

## 95 2 Notations and preliminaries

96 **Notation** The covariates of the source and the target domains are denoted by  $\mathcal{X}_S$  and  $\mathcal{X}_T$ , respec-  
 97 tively, and  $\mathcal{X} := \mathcal{X}_S \cup \mathcal{X}_T$ . The space of the label is denoted by  $\mathcal{Y}$ . We use the notation  $\mathbb{E}_S$  (resp.  
 98  $\mathbb{E}_T$ ) to denote the expectation with respect to the source (resp. target) distribution. The expectation  
 99 with respect to sample distribution is denoted by  $\mathbb{E}_{n,S}$  and  $\mathbb{E}_{n,T}$ . We use  $p_S$  (resp.  $p_T$ ) to denote the  
 100 probability density function of  $X$  on the source and the target domain, respectively. Throughout the  
 101 paper, we use  $c$  to denote universal constants, which may vary from line to line.

### 102 2.1 Problem formulation

103 Our setup aligns with the unsupervised domain adaption; we assume to have  $n_S$  i.i.d. labeled  
 104 samples  $\{X_{S,i}, Y_{S,i}\}_{i=1}^{n_S} \sim \mathbb{P}_S(X, Y)$  from the source domain, and  $n_T$  i.i.d. unlabeled samples  
 105  $\{X_{T,i}\}_{i=1}^{n_T} \sim \mathbb{P}_T(X)$  from the target domain. Given any  $\alpha > 0$ , ideally, we want to construct a  
 106 valid prediction interval with minimal width on the target domain:

$$\min_{f \in \mathcal{F}} \mathbb{E}_T[u(X) - l(X)], \text{ s.t. } \mathbb{P}_T(l(X) \leq Y \leq u(X)) \geq 1 - \alpha. \quad (2.1)$$

107 In many practical contexts, the preferred prediction interval takes the form of  $m(X) \pm g(X)$ , where  
 108  $m(X)$  is a predictor for  $Y$  given  $X$  (an estimator of  $\mathbb{E}_T[Y | X]$ ), and  $g(X)$  gauges the uncertainty  
 109 of the predictor  $m(X)$ . The optimizer of (2.1) takes this simplified form when the distribution  
 110 of  $Y - \mathbb{E}_T[Y | X]$  is symmetric around 0. Moreover, it offers a straightforward interpretation  
 111 as the pair  $(m, g)$  is a predictor and a function quantifying its uncertainty. Within the framework  
 112 of this simplified prediction interval, we need to estimate  $m$  and  $g$ . Estimating the conditional  
 113 mean function  $m$  is relatively easy and has been extensively studied; one may use any suitable  
 114 parametric/non-parametric method. Upon estimating  $m$ , we need to estimate  $g$  so that the prediction  
 115 interval  $[m(X) \pm g(X)]$  has both adequate coverage and minimal width. This translates into solving  
 116 the following optimization problem:

$$\min_{f \in \mathcal{F}} \mathbb{E}_T[f(X)], \text{ s.t. } \mathbb{P}_T((Y - m(X))^2 > f(X)) \leq \alpha. \quad (2.2)$$

117 Let  $f_0$  be the solution of the above optimization problem. Then the optimal prediction interval is  
 118  $[m_0(x) \pm \sqrt{f_0(x)}]$ . However, the key challenge here is that we do not observe the response variable  
 119  $Y$  from the target, and consequently, solving (2.2) becomes infeasible. Hence, we must rely on  
 120 transferring our knowledge acquired from labeled observations in the source domain, which neces-  
 121 sitates making certain assumptions regarding the similarity between the two domains. Depending  
 122 on the nature of these assumptions regarding domain similarity, our findings are presented in two  
 123 sections: Section 3 addresses covariate shift under the bounded density ratio assumption, while Sec-  
 124 tion 4 considers a more general distribution assumption under measure-preserving transformations.  
 125 Furthermore, as will be shown later, this problem, though well-defined, is not easily implementable.  
 126 Therefore, we propose a surrogate convex optimization problem in this paper and provide its theo-  
 127 retical guarantees.

### 128 2.2 Complexity measure

129 The complexity of the function class  $\mathcal{F}$  is usually quantified through the Rademacher complexity,  
 130 defined as follows.

131 **Definition 2.1** (Rademacher complexity). *Let  $\mathcal{F}$  be a function class and  $\{X_i\}_{i=1}^n$  be a set of samples  
 132 drawn i.i.d. from a distribution  $\mathcal{D}$ . The Rademacher complexity of  $\mathcal{F}$  is defined as*

$$\mathcal{R}_n(\mathcal{F}) = \mathbb{E}_{\epsilon, \mathcal{D}} \left[ \sup_{f \in \mathcal{F}} \frac{1}{n} \sum_{i=1}^n \epsilon_i f(X_i) \right], \quad (2.3)$$

133 where  $\{\epsilon_i\}_{i=1}^n$  are i.i.d. Rademacher random variables that equals to  $\pm 1$  with probability  $1/2$  each.

## 134 3 Covariate shift with bounded density ratio

135 **Setup and methodology** In this section, we focus on the covariate shift problems, where the  
 136 marginal densities  $p_S(X)$  and  $p_T(X)$  of the covariates may vary between the source and target

domains, albeit the conditional distribution  $Y|X$  remains same. Denote by  $m_0(x) = \mathbb{E}_T[Y|X = x] = \mathbb{E}_S[Y|X = x]$ , the conditional mean function. For the ease of the presentation, we assume  $m_0$  is known. If unknown, one may use the labeled source data to estimate it using a suitable parametric/non-parametric estimate (e.g., splines, local polynomial, or deep neural networks), subsequently substituting  $m_0$  with  $\hat{m}$  in our approach. The density ratio of the source and the target distribution of  $X$  is denoted by  $w_0(x) := p_T(x)/p_S(x)$ . We henceforth assume that the density ratio is uniformly bounded:

**Assumption 3.1.** *There exists  $W$  such that  $\sup_{x \in \mathcal{X}_S} w_0(x) \leq W$ .*

If  $w_0$  is known, (2.2) has the following sample level counterpart:

$$\min_{f \in \mathcal{F}} \mathbb{E}_{n,T}[f(X)], \text{ s.t. } \mathbb{E}_{n,S}[w_0(X) \mathbb{1}_{(Y - m_0(X))^2 > f(X)}] \leq \alpha, \quad (3.1)$$

which is NP-hard owing to the presence of the indicator function. However, in many practical scenarios, it is observed that the shape of the prediction band does not change much if we change the level of coverage (i.e.,  $\alpha$ ); only the bands shrink/expand. Indeed, the true shape determines the average width; if the shape is wrong, then the width of the prediction band is quite likely to be unnecessarily large. Therefore, to obtain a prediction interval with adequate coverage and minimal width, one should first identify the shape of the prediction band and then shrink/expand it appropriately to get the desired coverage. This motivates the following two steps procedure:

**Step 1:** (Shape estimation) Obtain an initial estimate  $\hat{f}_{\text{init}}$  via by solving (3.1) for  $\alpha = 0$  (to capture the shape):

$$\min_{f \in \mathcal{F}} \mathbb{E}_{n,T}[f(X)], \text{ s.t. } f(X_i) \geq (Y_i - m_0(X_i))^2 \quad \forall 1 \leq i \leq n_S : w_0(X_i) > 0. \quad (3.2)$$

**Step 2:** (Shrinkage) Refine  $\hat{f}_{\text{init}}$  by scaling it down using  $\hat{\lambda}(\alpha)$ , defined as:

$$\hat{\lambda}(\alpha) = \inf \left\{ \lambda \geq 0 : \mathbb{E}_{n,S}[w_0(X) \mathbb{1}_{(Y - m_0(X))^2 > \lambda \hat{f}_{\text{init}}(X)}] \leq \alpha \right\}. \quad (3.3)$$

The final prediction interval is:

$$\widehat{\text{PI}}_{1-\alpha}(x) = \left[ m_0(x) - \sqrt{\hat{\lambda}(\alpha) \hat{f}_{\text{init}}(x)}, m_0(x) + \sqrt{\hat{\lambda}(\alpha) \hat{f}_{\text{init}}(x)} \right]. \quad (3.4)$$

In Step 1, we relax (3.1) by effectively setting  $\alpha = 0$ . This relaxation aids in determining the optimal shape while also converting (3.1) into a convex optimization problem (equation (3.2)) as long as  $\mathcal{F}$  is a convex collection of functions. Furthermore, in (3.2), we only consider those source observations for which  $w_0(x) > 0$ , as otherwise, the samples are not informative for the target domain. In practice,  $w_0$  is typically unknown; one may use the source and target domain covariates to estimate  $w_0$ . Various techniques are available for estimating the density ratio (e.g., Uehara et al. (2016); Choi et al. (2022); Qin (1998); Gretton et al. (2008) and references therein). However, any such estimator  $\hat{w}(x)$  can be non-zero for  $x$  where  $w_0(x) = 0$  due to estimation error. Consequently,  $\hat{w}$  may not be efficient in selecting informative source samples. To mitigate this issue, we propose below a modification of (3.2), utilizing a hinge function  $h_\delta(t) := \max\{0, (t/\delta) + 1\}$ :

$$\min_{f \in \mathcal{F}} \mathbb{E}_{n,T}[f(X)] \quad (3.5)$$

$$\text{subject to } \mathbb{E}_{n,S}[\hat{w}(X) h_\delta((Y - m_0(X))^2 - f(X))] \leq \epsilon,$$

with  $\delta$  and  $\epsilon$  should be chosen based on sample size  $n_S$  and the estimation accuracy of  $\hat{w}$ . When  $\hat{w} = w_0$  (i.e., the density ratio is known), then by choosing  $\epsilon = 0$  and  $\delta \rightarrow 0$ , (3.5) recovers (3.2). As  $h_\delta$  is convex, the optimization problem (3.5) is still a convex optimization problem. We summarize our algorithm in Algorithm 1.

**Theoretical results** We next present theoretical guarantees of the prediction interval obtained via Algorithm 1. For technical convenience, we resort to data-splitting; we divide the source data into two equal parts ( $\mathcal{D}_{S,1}$  and  $\mathcal{D}_{S,2}$ ), use  $\mathcal{D}_{S,1}$  and  $\mathcal{D}_T$  to solve (3.5), and  $\mathcal{D}_{S,2}$  to obtain the shrink level  $\hat{\lambda}(\alpha)$ . Without loss of generality, we assume  $m_0 \equiv 0$  (otherwise, we set  $Y \leftarrow Y - m_0(X)$ ). A careful inspection of Step 1 reveals that  $\hat{f}_{\text{init}}$  aims to approximate a function  $f^*$  defined as follows:

$$f^* = \arg \min_{f \in \mathcal{F}} \mathbb{E}_T[f(X)] \text{ subject to } Y^2 < f(X) \text{ almost surely on target domain.} \quad (3.6)$$

In other words,  $\hat{f}_{\text{init}}$  estimates  $f^*$  that has minimal width among all functions covering the response variable. This is motivated by the philosophy that the *right shape leads to a smaller width*. The following theorem provides a finite sample concentration bound on the approximation error of  $\hat{f}_{\text{init}}$ :

---

**Algorithm 1** Prediction intervals with bounded density ratio

---

- 1: **Input:**  $m_0$  (or  $\hat{m}$  if unknown), density ratio estimator  $\hat{w}$ , function class  $\mathcal{F}$ , sample  $\mathcal{D}_S = \{(X_{S,i}, Y_{S,i})\}_{i=1}^{n_S}$  and  $\mathcal{D}_T = \{X_{T,i}\}_{i=1}^{n_T}$ , parameters  $\delta, \epsilon$ , coverage level  $1 - \alpha$ .
  - 2: Obtain  $\hat{f}_{\text{init}}$  by solving (3.5).
  - 3: Obtain the shrink level  $\hat{\lambda}(\alpha)$  by solving (3.3) with  $w_0$  replaced by  $\hat{w}$ .
  - 4: **Output:**  $\widehat{\text{PI}}_{1-\alpha}(x)$  defined in (3.4).
- 

180 **Theorem 3.2.** Suppose  $Y^2 - f^*(X) \leq B$  on the source domain and has a density bounded by  $L$ .  
 181 Also assume  $\|f\|_\infty \leq B_{\mathcal{F}}$  for all  $f \in \mathcal{F}$ . Then for

$$\epsilon \geq L\delta + W\sqrt{\frac{t}{n_S}} + \frac{B+\delta}{\delta} \cdot \left( \mathbb{E}_S[|\hat{w}(X) - w_0(X)|] + (W + W')\sqrt{\frac{t}{n_S}} \right), \quad (3.7)$$

182 we have with probability at least  $1 - 3e^{-t}$ :

$$\mathbb{E}_T[\hat{f}_{\text{init}}(X)] \leq \mathbb{E}_T[f^*(X)] + 2\mathcal{R}_{n_T}(\mathcal{F} - f^*) + 2B_{\mathcal{F}}\sqrt{\frac{t}{2n_T}}$$

183 where  $W' = \|\hat{w}\|_\infty$ .

184 The bound in the above theorem depends on the Rademacher complexity of  $\mathcal{F}$  (the smaller, the  
 185 better), the estimation error of  $w_0$ , and an interplay between the choice of  $(\epsilon, \delta)$ . The lower bound  
 186 on  $\epsilon$  in (3.7) depends on both  $\delta$  and  $1/\delta$ . Although it is not immediate from the above theorem why  
 187 we need to choose  $\epsilon$  to be as small as possible, it will be apparent in our subsequent analysis; indeed  
 188 if  $\epsilon$  is large in (3.5), then  $\hat{f}_{\text{init}} \equiv 0$  will be a solution of (3.5). Consequently, the shape will not be  
 189 captured. Therefore, one should first choose  $\delta$  (say  $\delta^*$ ), that minimizes the lower bound (3.7), and  
 190 then set  $\epsilon = \epsilon^*$  equal to the value of the right-hand side of (3.7) with  $\delta = \delta^*$ , which ensures that  
 191  $\epsilon^*$  is optimally defined to capture the shape accurately. Once the shape is identified, we shrink it  
 192 properly in Step 2 to attain the desired coverage and reduce the width. Although ideally  $\hat{\lambda}(\alpha) \leq 1$ ,  
 193 it is not immediately guaranteed as we use separate data  $(\mathcal{D}_{S,2})$  for shrinking. The following lemma  
 194 shows that  $\hat{\lambda}(\alpha) \leq 1$  for any fixed  $\alpha > 0$  as long as the sample size is large enough. Recall that the  
 195 data were split into exactly half with size  $n_S = |\mathcal{D}_S|$ .

**Lemma 3.3.** Under the aforementioned choice of  $(\epsilon^*, \delta^*)$ , we have with high probability:

$$\frac{1}{n_S/2} \sum_{i \in \mathcal{D}_{S,2}} \hat{w}(X_i) \mathbb{1}_{\{(Y_i - m_0(X_i))^2 > \hat{f}_{\text{init}}(X_i)\}} \leq \alpha,$$

196 for all large  $n_S$ , provided that  $\hat{w}$  is a consistent estimator of  $w_0$ . Hence,  $\hat{\lambda}(\alpha) \leq 1$ .

197 Our final theorem for this section provides a coverage guarantee for the prediction interval given by  
 198 Algorithm 1.

199 **Theorem 3.4.** For the prediction interval obtained in (3.4), with probability greater than  $1 - 2e^{-t}$ :

$$\left| \mathbb{P}_T \left( Y^2 > \hat{\lambda}(\alpha) \hat{f}_{\text{init}}(X) \mid \mathcal{D}_S \cup \mathcal{D}_T \right) - \alpha \right| \leq \mathbb{E}_S[|\hat{w}(X) - w(X)|] + (2W + W')\sqrt{\frac{t}{2n_S}} + \sqrt{\frac{C}{n_S}}$$

200 for some constant  $C > 0$  and  $W' = \|\hat{w}\|_\infty$ .

201 Theorem 3.4 validates the coverage of the prediction interval derived through Algorithm 1, achieving  
 202 the desired coverage level as the estimate of  $w_0$  improves and sample size expands. Theorems 3.2  
 203 and 3.4 collectively demonstrate the efficacy of our method in maintaining validity and accurately  
 204 capturing the optimal shape of the prediction band, which in turn leads to small interval widths.

205 **Remark 3.5.** In our optimization problem, we've substituted the indicator loss with the hinge loss  
 206 function to ensure convexity. However, it's worth noting that if we know the subset of  $\mathcal{X}_S$  where  
 207  $w_0(x) > 0$  beforehand, we could directly optimize (3.2). This approach would be easy to implement  
 208 and wouldn't involve tuning parameters  $(\delta, \epsilon)$ . A special case is when  $w_0(x) > 0$  for all  $x \in \mathcal{X}_S$  (as  
 209 is true in our experiment), which simplifies the condition in (3.2) to  $f(X_i) \geq (Y_i - m_0(X_i))^2$  for all  
 210  $1 \leq i \leq n_S$ . However, if this information is unavailable, one can still employ (3.2) by enforcing the  
 211 constraint on all source observations. While this approach might result in wider prediction intervals,  
 212 it is easy to implement and doesn't require tuning parameters.



## 4 Domain shift and transport map

**Setup and methodology** In the previous section, we assume a uniform bound on the density ratio. However, this may not be the case in reality; it is possible that there exists  $x \in \text{supp}(\mathcal{X}_T) \cap \text{supp}(\mathcal{X}_S^c)$ , which immediately implies that  $w_0(x) = \infty$ . In image recognition problems, if the source data are images taken during the day at some place, and the target data are images taken at night, then this directly results in an unbounded density ratio (due to the change in the background color). Yet a transport map could effectively model this shift by adapting features from the source to correspond with those of the target, maintaining the underlying patterns or object recognition capabilities across both domains. To perform transfer learning in this setup, we model the domain shift via a measure transport map  $T_0$  that preserves the conditional distribution, as elaborated in the following assumption:

**Assumption 4.1.** *There exists a measure transport map  $T_0 : \mathcal{X}_T \rightarrow \mathcal{X}_S$ , i.e.,  $T_0(X_T) \stackrel{d}{=} X_S$ , such that:  $\mathbb{P}_T(Y | X = x) \stackrel{d}{=} \mathbb{P}_S(Y | X = T_0(x))$ ,  $\forall x \in \mathcal{X}_T$ .*

This assumption allows the extrapolation of source domain information to the target domain via  $T_0$ , enabling the construction of prediction intervals at  $x \in \mathcal{X}_T$  by leveraging the analogous intervals at  $T_0(x) \in \mathcal{X}_S$ . Inspired by this observation, we present our methodology in Algorithm 2 that essentially consists of two key steps: i) constructing a prediction interval in the source domain and ii) transporting this interval to the target domain using the estimated transport map  $T_0$ . If  $T_0$  (or its estimate) is not given, it must be estimated from the source and the target covariates. Various methods are available in the literature (e.g., Divol et al. (2022); Seguy et al. (2017); Makuva et al. (2020); Deb et al. (2021)), and practitioners can pick a method at their convenience. Notably, the processes described in equations (4.1) and (4.2) follow the methodology (i.e., (3.2) and (3.3)) from Section 3 for scenarios without shift (i.e.,  $w_0 \equiv 1$ ), adding a slight  $\delta$  to ensure coverage even when  $\mathcal{F}$  is complex. In Algorithm 2, we assume the conditional mean function  $m_0$  on the source domain

---

### Algorithm 2 Transport map

---

1: **Input:** conditional mean function  $m_0$  on the source domain, transport map estimator  $\hat{T}_0$ , function class  $\mathcal{F}$ , sample  $\mathcal{D}_S = \{(X_{S,i}, Y_{S,i})\}_{i=1}^{n_S}$  and  $\mathcal{D}_T = \{X_{T,i}\}_{i=1}^{n_T}$ , parameter  $\delta$ , coverage level  $1 - \alpha$ .

2: Obtain  $\hat{f}_{\text{init}}$  by solving:

$$\min_{f \in \mathcal{F}} \frac{1}{n_S} \sum_{i=1}^{n_S} f(X_{S,i}), \quad \text{s.t.} \quad f(X_{S,i}) \geq (Y_{S,i} - m_0(X_{S,i}))^2 \quad \forall i \in [n_S]. \quad (4.1)$$

3: Obtain the shrink level

$$\hat{\lambda}(\alpha) := \inf \left\{ \lambda > 0 : \frac{1}{n_S} \sum_{i=1}^{n_S} \mathbb{1}_{(Y_{S,i} - m_0(X_{S,i}))^2 \geq \lambda(\hat{f}_{\text{init}}(X_{S,i}) + \delta)} \leq \alpha \right\}. \quad (4.2)$$

4: **Output:**  $\widehat{\text{PI}}_{1-\alpha}(x) = \left[ m_0 \circ \hat{T}_0(x) \pm \sqrt{\hat{\lambda}(\alpha) \cdot (\hat{f}_{\text{init}} \circ \hat{T}_0(x) + \delta)} \right]$ .

---

is known. In cases where the conditional mean function  $m_0$  on the source domain is unknown, it can be estimated using standard regression methods from labeled source data, after which  $m_0$  is replaced by this estimate,  $\hat{m}$ .

**Remark 4.2** (Model aggregation). *Suppose we have  $K$  different methods  $\{f_1, \dots, f_K\}$  for constructing prediction intervals in the source domain. In the context of model aggregation, (4.1) then reduces to:*

$$\begin{aligned} & \min_{\alpha_1, \dots, \alpha_K} \quad \frac{1}{n_S} \sum_{i=1}^{n_S} \left\{ \sum_{j=1}^K \alpha_j f_j(X_{S,i}) \right\} \\ & \text{subject to} \quad \sum_{j=1}^K \alpha_j f_j(X_{S,i}) \geq (Y_{S,i} - m_0(X_{S,i}))^2 \quad \forall i \in [n_S], \\ & \quad \alpha_j \geq 0, \quad \forall 1 \leq j \leq K. \end{aligned}$$

243 *In other words, the function class  $\mathcal{F}$  is a linear combination of the candidate methods. The problem*  
 244 *is then simplified to a linear program problem, which can be implemented efficiently using standard*  
 245 *solvers.*

246 **Theoretical results** We now present theoretical guarantees of our methodology to ensure that our  
 247 method delivers what it promises: a prediction interval with adequate coverage and small width.  
 248 For technical simplicity, we split data here: divide the labeled source observation with two equal  
 249 parts (with  $n_S/2$  observations in each), namely  $\mathcal{D}_{S,1}$  and  $\mathcal{D}_{S,2}$ . We use  $\mathcal{D}_{S,1}$  to solve (4.1) and  
 250 obtain the initial estimator  $\hat{f}_{\text{init}}$ , and  $\mathcal{D}_{S,2}$  to solve (4.2), i.e. obtaining the shrinkage factor  $\hat{\lambda}(\alpha)$ .  
 251 Henceforth, without loss of generality, we assume  $m_0 = 0$  and present the theoretical guarantees  
 252 of our estimator. We start with an analog of Theorem 3.2, which ensures that with high probability  
 253  $\hat{f}_{\text{init}} \circ \hat{T}_0$  approximates the function that has minimal width among all the functions in  $\mathcal{F}$  composed  
 254 with  $T_0$  that covers the labels on the target almost surely:

255 **Theorem 4.3.** *Assume the function class  $\mathcal{F}$  is  $B_{\mathcal{F}}$ -bounded and  $L_{\mathcal{F}}$ -Lipschitz. Define*

$$\Delta = \min \{ \mathbb{E}_T[f \circ T_0(X)] : f \in \mathcal{F}, Y^2 \leq f \circ T_0(X) \text{ a.s. on target domain} \}.$$

Then we have with probability  $\geq 1 - e^{-t}$ :

$$\mathbb{E}_T[\hat{f}_{\text{init}} \circ \hat{T}_0(X)] \leq \Delta + 4\mathcal{R}_{n_S}(\mathcal{F}) + L_{\mathcal{F}}\mathbb{E}_T[|\hat{T}_0(X) - T_0(X)|] + 4B_{\mathcal{F}}\sqrt{\frac{t}{2n_S}}.$$

256 The upper bound on the population width of  $\hat{f}_{\text{init}} \circ \hat{T}_0(x)$  consists of four terms: the first term is the  
 257 *minimal possible width* that can be achieved using the functions from  $\mathcal{F}$ , the second term involves  
 258 the Rademacher complexity of  $\mathcal{F}$ , the third term encodes the estimation error of  $T_0$ , and the last  
 259 term is the deviation term that influences the probability. Hence, the margin between the width of  
 260 the predicted interval and the minimum achievable width is small, with the convergence rate relying  
 261 on the precision of estimating  $T_0$  and the complexity of  $\mathcal{F}$ , as expected.

262 We next establish the coverage guarantee of our estimator of Algorithm 2, obtained upon suitable  
 263 truncation of  $\hat{f}_{\text{init}}$ . As mentioned, the shrinkage operation is performed on a separate dataset  $\mathcal{D}_{S,2}$ .  
 264 Therefore, it is not immediate whether the shrinkage factor  $\hat{\lambda}(\alpha)$  is smaller than 1, i.e., whether  
 265 we are indeed shrinking the confidence interval ( $\hat{\lambda}(\alpha) > 1$  is undesirable, as it will widen  $\hat{f}_{\text{init}}$ ,  
 266 increasing the width of the prediction band). The following lemma shows that with high probability,  
 267  $\hat{\lambda}(\alpha) \leq 1$ .

268 **Lemma 4.4.** *With probability greater than or equal to  $1 - e^{-t}$ , we have:*

$$\mathbb{P}(\hat{\lambda}(\alpha) > 1 \mid \mathcal{D}_{S,1}, \mathcal{D}_T) \leq e^{-\frac{(\alpha - p_{n_S})^2 n_S}{6p_{n_S}}},$$

269 where

$$p_{n_S} = \mathbb{P}_S \left( Y^2 \geq \hat{f}_{\text{init}}(X) + \delta \mid \mathcal{D}_{S,1}, \mathcal{D}_T \right) \leq \frac{4}{\delta} \left( \sqrt{\frac{\mathbb{E}_S[Y^4]}{n_S}} + \mathcal{R}_{n_S}(\mathcal{F}) \right) + \sqrt{\frac{t}{n_S}}.$$

270 Here  $p_{n_S}$  is the conditional probability of a test observation  $Y$  falling outside  
 271  $[-\sqrt{\hat{f}_{\text{init}}(X) + \delta}, \sqrt{\hat{f}_{\text{init}}(X) + \delta}]$ , which is small as evident from the above lemma. In par-  
 272 ticular, for model aggregation, if  $\mathcal{F}$  is the linear combination of  $K$  functions, then  $p_{n_S}$  is of the  
 273 order  $\sqrt{K/n_S}$ . Hence, the final prediction interval is guaranteed to be a compressed form of  $\hat{f}_{\text{init}}$   
 274 with an overwhelmingly high probability. We present our last theorem of this section, confirming  
 275 that the prediction interval derived from Algorithm 2 achieves the intended coverage level with a  
 276 high probability:

277 **Theorem 4.5.** *Under the same setup of Theorem 4.3, along with the assumption that  $f_S(y \mid x)$  is*  
 278 *uniformly bounded by  $G$ , we have with probability greater than  $1 - cn_S^{-10}$  that*

$$\begin{aligned} & \left| \mathbb{P}_T \left( Y^2 \geq \hat{\lambda}(\alpha) \left( \hat{f}_{\text{init}} \circ \hat{T}_0(X) + \delta \right) \mid \mathcal{D}_S \cup \mathcal{D}_T \right) - \alpha \right| \\ & \leq C \sqrt{\frac{\log n_S}{n_S}} + GL_{\mathcal{F}} \cdot \mathbb{E}_T \left[ \left| \hat{T}_0(X) - T_0(X) \right| \right]. \end{aligned}$$

As for Theorem 4.3, the bound obtained in Theorem 4.5 also depends on two crucial terms: Rademacher complexity of  $\mathcal{F}$  and estimation error of  $T_0$ . Therefore, the key takeaway of our theoretical analysis is that the prediction interval obtained from Algorithm 2 asymptotically achieves nominal coverage guarantee and minimal width. Furthermore, the approximation error intrinsically depends on the Rademacher complexity of the underlying function class and the precision in estimating  $T_0$ .

**Remark 4.6** (Measure preserving transformation). *In our approach,  $T_0$  is employed to maintain measure transformation, although it may not necessarily be an optimal transport map. Yet, estimating  $T_0$  can be challenging in many practical scenarios. In such cases, simpler transformations like linear or quadratic adjustments are often utilized to align the first few moments of the distributions. Various methods provide such simple solutions, including, but not limited to, CORAL (Sun et al., 2017) and ADDA (Tzeng et al., 2017).*

## 5 Application

In this section, we illustrate the effectiveness of our method using the airfoil dataset from the UCI Machine Learning Repository (Dua and Graff, 2019). This dataset includes 1503 observations, featuring a response variable  $Y$  (scaled sound pressure level) and a five-dimensional covariate  $X$  (log of frequency, angle of attack, chord length, free-stream velocity, log of suction side displacement thickness). We assess and compare the performance of our prediction intervals in terms of coverage and width with those generated by the weighted split conformal prediction method described in Tibshirani et al. (2019).

We use the same data-generating process described in Tibshirani et al. (2019) to facilitate a direct comparison. We have run experiments 200 times; each time, we randomly partitioned the data into two parts  $\mathcal{D}_{\text{train}}$  and  $\mathcal{D}_{\text{test}}$ , where  $\mathcal{D}_{\text{train}}$  contains 75% of the data, and  $\mathcal{D}_{\text{test}}$  contains 25% of the data. Following Tibshirani et al. (2019), we *shift* the distribution of the covariates of  $\mathcal{D}_{\text{test}}$  by weighted sampling with replacement, where the weights are proportional to

$$w(x) = \exp(x^T \beta), \quad \text{where } \beta = (-1, 0, 0, 0, 1).$$

These reweighted observations in  $\mathcal{D}_{\text{test}}$ , which we call  $\mathcal{D}_{\text{shift}}$ , act as observations from the target domain. Clearly, by our data generation mechanism  $w_0(x) = f_T(x)/f_S(x) = c \exp(x^T \beta)$ , where  $c$  is the normalizing constant. The source and target domains share the same support under this configuration. As our methodology is developed for unsupervised domain adaptation, we do not use the label information of  $\mathcal{D}_{\text{shift}}$  to develop the target domain’s prediction interval.

**Density ratio estimation** We use the probabilistic classification technique to estimate the density based on the source and the target covariates. Let  $X_1, \dots, X_{n_1}$  be the covariates in dataset  $\mathcal{D}_{\text{train}}$  and  $X_{n_1+1}, \dots, X_{n_1+n_2}$  be the covariates in dataset  $\mathcal{D}_{\text{shift}}$ . The density ratio estimation proceeds in two steps: (1) logistic regression is applied to the feature-class pairs  $\{(X_i, C_i)\}_{i=1}^n$ , where  $C_i = 0$  for  $i = 1, \dots, n_1$  and  $C_i = 1$  for  $i = n_1 + 1, \dots, n_1 + n_2$ , yielding an estimate of  $\mathbb{P}(C = 1 \mid X = x)$ , denoted as  $\hat{p}(x)$ ; (2) the density ratio estimator is then defined as  $\hat{w}(x) = \frac{n_1}{n_2} \cdot \frac{\hat{p}(x)}{1 - \hat{p}(x)}$ . Further explanations are provided in Appendix B.

**Implementation of our method and results** As the mean function  $m_0(x) = \mathbb{E}[Y \mid X = x]$  (which is the same on the source and the target domain) is unknown, we first estimate it via linear regression, which henceforth will be denoted by  $\hat{m}(x)$ . To construct a prediction interval, we consider the model aggregation approach, i.e., the function class  $\mathcal{F}$  is defined as the linear combination of the following six estimates:

- (1) **Estimator 1**( $f_1$ ): A neural network based estimator with depth=1, width=10 that estimates the 0.85 quantile function of  $(Y - \hat{m}(X))^2 \mid X = x$ .
- (2) **Estimator 2**( $f_2$ ): A fully connected feed forward neural network with depth=2 and width=50 that estimates the 0.95 quantile function of  $(Y - \hat{m}(X))^2 \mid X = x$ .
- (3) **Estimator 3**( $f_3$ ): A quantile regression forest estimating the 0.9 quantile function of  $(Y - \hat{m}(X))^2 \mid X = x$ .
- (4) **Estimator 4**( $f_4$ ): A gradient boosting model estimating the 0.9 quantile function of  $(Y - \hat{m}(X))^2 \mid X = x$ .



329 (5) **Estimator 5**( $f_5$ ): An estimate of  $\mathbb{E}[(Y - \hat{m}(X))^2 \mid X = x]$  using random forest.

330 (6) **Estimator 6**( $f_6$ ): The constant function 1.

331 Here, the quantile estimators are obtained by minimizing the corresponding check loss. The im-  
 332 plementation of our method is summarized as follows: (1) We divide the training data  $\mathcal{D}_{\text{train}}$  into  
 333 two halves  $\mathcal{D}_1 \cup \mathcal{D}_2$ . We utilize dataset  $\mathcal{D}_1$  to derive a mean estimator and six aforementioned esti-  
 334 mates. We also employ the covariates from  $\mathcal{D}_1$  and  $\mathcal{D}_{\text{shift}}$  to compute a density ratio estimator. (2)  
 335 We further split  $\mathcal{D}_2$  into two equal parts  $\mathcal{D}_{2,1}$  and  $\mathcal{D}_{2,2}$ .  $\mathcal{D}_{2,1}$ , along with covariates from  $\mathcal{D}_{\text{shift}}$ ,  
 336 is used to find the optimal aggregation of the six estimates to capture the shape, i.e., for obtaining  
 337  $\hat{f}_{\text{init}}$ . The second part  $\mathcal{D}_{2,2}$  is used to shrink the interval to achieve  $1 - \alpha = 0.95$  coverage, i.e.  
 338 to estimate  $\hat{\lambda}(\alpha)$ . (3) We evaluate the effectiveness of our approach in terms of the coverage and  
 339 average bandwidth on the  $\mathcal{D}_{\text{shift}}$  dataset.

340 We now present the histograms of the coverage and the average bandwidth of our method, and a more  
 341 general version of weighted conformal prediction in Tibshirani et al. (2019) over 200 experiments  
 (see Appendix B for details), which show that our method consistently yields a shorter prediction

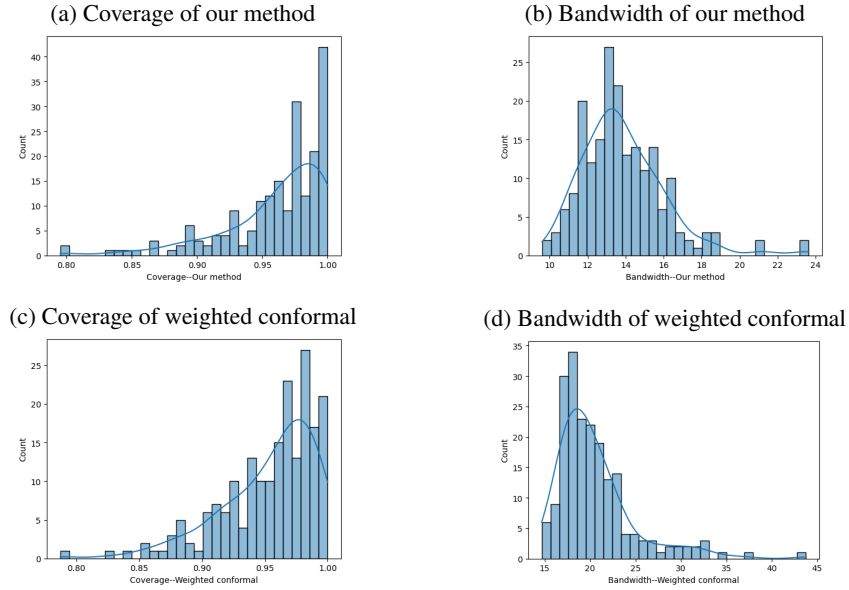

342 interval than the weighted conformal prediction while maintaining coverage. Over 200 experiments,  
 343 the average coverage achieved by our method was 0.964029 (SD = 0.04), while the weighted con-  
 344 formal prediction method achieved an average coverage of 0.9535 (SD = 0.036). Additionally, the  
 345 average width of the prediction intervals for our method was 13.654 (SD = 2.22), compared to 20.53  
 346 (SD = 4.13) for the weighted conformal prediction. Regarding the performance of intervals over  
 347 95% coverage, our method achieved this in 72.5% of cases with an average width of 14.35 (SD =  
 348 2.22). In contrast, the weighted conformal prediction method did so in 57% of cases with an average  
 349 width of 21.4 (SD = 4.39). Boxplots are presented in Appendix B for further comparison.

## 351 6 Conclusion

352 This paper focuses on unsupervised domain shift problems, where we have labeled samples from  
 353 the source domain and unlabeled samples from the target domain. We introduce methodologies for  
 354 constructing prediction intervals on the target domain that are designed to ensure adequate coverage  
 355 while minimizing width. Our analysis includes scenarios in which the source and target domains are  
 356 related either through a bounded density ratio or a measure-preserving transformation. Our proposed  
 357 methodologies are computationally efficient and easy to implement. We further establish rigorous  
 358 finite sample theoretical guarantees regarding the coverage and width of our prediction intervals.  
 359 Finally, we demonstrate the practical effectiveness of our methodology through its application to the  
 360 airfoil dataset.

## References

- Choi, K., Meng, C., Song, Y., and Ermon, S. (2022). Density ratio estimation via infinitesimal classification. In *International Conference on Artificial Intelligence and Statistics*, pages 2552–2573. PMLR.
- Courty, N., Flamary, R., Habrard, A., and Rakotomamonjy, A. (2017). Joint distribution optimal transportation for domain adaptation. *Advances in neural information processing systems*, 30.
- Courty, N., Flamary, R., and Tuia, D. (2014). Domain adaptation with regularized optimal transport. In *Machine Learning and Knowledge Discovery in Databases: European Conference, ECML PKDD 2014, Nancy, France, September 15-19, 2014. Proceedings, Part I 14*, pages 274–289. Springer.
- Courty, N., Flamary, R., Tuia, D., and Rakotomamonjy, A. (2016). Optimal transport for domain adaptation. *IEEE transactions on pattern analysis and machine intelligence*, 39(9):1853–1865.
- De Lange, M., Aljundi, R., Masana, M., Parisot, S., Jia, X., Leonardis, A., Slabaugh, G., and Tuytelaars, T. (2021). A continual learning survey: Defying forgetting in classification tasks. *IEEE transactions on pattern analysis and machine intelligence*, 44(7):3366–3385.
- Deb, N., Ghosal, P., and Sen, B. (2021). Rates of estimation of optimal transport maps using plug-in estimators via barycentric projections. *Advances in Neural Information Processing Systems*, 34:29736–29753.
- Divol, V., Niles-Weed, J., and Pooladian, A.-A. (2022). Optimal transport map estimation in general function spaces. *arXiv preprint arXiv:2212.03722*.
- Dua, D. and Graff, C. (2019). Uci machine learning repository. <https://archive.ics.uci.edu>.
- Eastwood, C., Robey, A., Singh, S., Von Kügelgen, J., Hassani, H., Pappas, G. J., and Schölkopf, B. (2022). Probable domain generalization via quantile risk minimization. *Advances in Neural Information Processing Systems*, 35:17340–17358.
- Fan, J., Ge, J., and Mukherjee, D. (2023). Utopia: Universally trainable optimal prediction intervals aggregation. *arXiv preprint arXiv:2306.16549*.
- Farahani, A., Voghoei, S., Rasheed, K., and Arabnia, H. R. (2021). A brief review of domain adaptation. *Advances in data science and information engineering: proceedings from ICDATA 2020 and IKE 2020*, pages 877–894.
- Gibbs, I. and Candes, E. (2021). Adaptive conformal inference under distribution shift. *Advances in Neural Information Processing Systems*, 34:1660–1672.
- Gretton, A., Smola, A., Huang, J., Schmittfull, M., Borgwardt, K., and Schölkopf, B. (2008). Co-variate shift by kernel mean matching.
- Hu, X. and Lei, J. (2023). A two-sample conditional distribution test using conformal prediction and weighted rank sum. *Journal of the American Statistical Association*, pages 1–19.
- Hull, J. J. (1994). A database for handwritten text recognition research. *IEEE Transactions on pattern analysis and machine intelligence*, 16(5):550–554.
- LeCun, Y., Bottou, L., Bengio, Y., and Haffner, P. (1998). Gradient-based learning applied to document recognition. *Proceedings of the IEEE*, 86(11):2278–2324.
- Lei, J., G’Sell, M., Rinaldo, A., Tibshirani, R. J., and Wasserman, L. (2018). Distribution-free predictive inference for regression. *Journal of the American Statistical Association*, 113(523):1094–1111.
- Lei, L. and Candès, E. J. (2021). Conformal inference of counterfactuals and individual treatment effects. *Journal of the Royal Statistical Society Series B: Statistical Methodology*, 83(5):911–938.
- Mai, Z., Li, R., Jeong, J., Quispe, D., Kim, H., and Sanner, S. (2022). Online continual learning in image classification: An empirical survey. *Neurocomputing*, 469:28–51.

407 Makkuva, A., Taghvaei, A., Oh, S., and Lee, J. (2020). Optimal transport mapping via input convex  
408 neural networks. In *International Conference on Machine Learning*, pages 6672–6681. PMLR.

409 Maurer, A. (2016). A vector-contraction inequality for rademacher complexities. In *Algorithmic*  
410 *Learning Theory: 27th International Conference, ALT 2016, Bari, Italy, October 19-21, 2016,*  
411 *Proceedings 27*, pages 3–17. Springer.

412 Netzer, Y., Wang, T., Coates, A., Bissacco, A., Wu, B., Ng, A. Y., et al. (2011). Reading digits  
413 in natural images with unsupervised feature learning. In *NIPS workshop on deep learning and*  
414 *unsupervised feature learning*, volume 2011, page 7. Granada, Spain.

415 Pan, S. J. and Yang, Q. (2009). A survey on transfer learning. *IEEE Transactions on knowledge and*  
416 *data engineering*, 22(10):1345–1359.

417 Qin, J. (1998). Inferences for case-control and semiparametric two-sample density ratio models.  
418 *Biometrika*, 85(3):619–630.

419 Redko, I., Habrard, A., and Sebban, M. (2017). Theoretical analysis of domain adaptation with  
420 optimal transport. In *Machine Learning and Knowledge Discovery in Databases: European*  
421 *Conference, ECML PKDD 2017, Skopje, Macedonia, September 18–22, 2017, Proceedings, Part*  
422 *II 10*, pages 737–753. Springer.

423 Seguy, V., Damodaran, B. B., Flamary, R., Courty, N., Rolet, A., and Blondel, M. (2017). Large-  
424 scale optimal transport and mapping estimation. *arXiv preprint arXiv:1711.02283*.

425 Sun, B., Feng, J., and Saenko, K. (2017). Correlation alignment for unsupervised domain adaptation.  
426 *Domain adaptation in computer vision applications*, pages 153–171.

427 Tibshirani, R. J., Foygel Barber, R., Candès, E., and Ramdas, A. (2019). Conformal prediction under  
428 covariate shift. *Advances in neural information processing systems*, 32.

429 Tzeng, E., Hoffman, J., Saenko, K., and Darrell, T. (2017). Adversarial discriminative domain  
430 adaptation. In *Proceedings of the IEEE conference on computer vision and pattern recognition*,  
431 pages 7167–7176.

432 Uehara, M., Sato, I., Suzuki, M., Nakayama, K., and Matsuo, Y. (2016). Generative adversarial nets  
433 from a density ratio estimation perspective. *arXiv preprint arXiv:1610.02920*.

434 Venkateswara, H., Eusebio, J., Chakraborty, S., and Panchanathan, S. (2017). Deep hashing network  
435 for unsupervised domain adaptation. In *Proceedings of the IEEE conference on computer vision*  
436 *and pattern recognition*, pages 5018–5027.

437 Wang, J., Lan, C., Liu, C., Ouyang, Y., Qin, T., Lu, W., Chen, Y., Zeng, W., and Philip, S. Y.  
438 (2022). Generalizing to unseen domains: A survey on domain generalization. *IEEE transactions*  
439 *on knowledge and data engineering*, 35(8):8052–8072.

440 Weiss, K., Khoshgoftaar, T. M., and Wang, D. (2016). A survey of transfer learning. *Journal of Big*  
441 *data*, 3:1–40.

442 Xu, R., Liu, P., Wang, L., Chen, C., and Wang, J. (2020). Reliable weighted optimal transport for  
443 unsupervised domain adaptation. In *Proceedings of the IEEE/CVF conference on computer vision*  
444 *and pattern recognition*, pages 4394–4403.

445 Yang, Y., Kuchibhotla, A. K., and Tchetgen, E. T. (2022). Doubly robust calibration of prediction  
446 sets under covariate shift. *arXiv preprint arXiv:2203.01761*.

447 Zhang, Y. and Yang, Q. (2021). A survey on multi-task learning. *IEEE Transactions on Knowledge*  
448 *and Data Engineering*, 34(12):5586–5609.

449 Zhou, K., Liu, Z., Qiao, Y., Xiang, T., and Loy, C. C. (2022). Domain generalization: A survey.  
450 *IEEE Transactions on Pattern Analysis and Machine Intelligence*, 45(4):4396–4415.

## 451 A Proofs

### 452 A.1 Proof of Theorem 3.2

First, we show that for our choice of  $(\epsilon, \delta)$ , as depicted in Theorem 3.2,  $f^*$  is a feasible solution of equation (3.5). Consider  $w_0$  instead of  $\hat{w}$ . By definition of  $f^*$ ,

$$\mathbb{P}_T(Y^2 \leq f^*(X)) = 1 \iff \mathbb{E}_S [w_0(X) \mathbf{1}_{Y^2 > f^*(X)}] = 0 \iff w_0(X) \mathbf{1}_{Y^2 > f^*(X)} = 0 \text{ a.s. on source.}$$

453 This implies:

$$\begin{aligned} & \frac{1}{n_S/2} \sum_{i \in \mathcal{D}_{S,1}} w_0(X_i) h_\delta(Y_i^2 - f^*(X_i)) \\ &= \frac{1}{n_S/2} \sum_{i \in \mathcal{D}_{S,1}} w_0(X_i) h_\delta(Y_i^2 - f^*(X_i)) \mathbf{1}_{Y_i^2 \leq f^*(X_i)} \\ &= \frac{1}{n_S/2} \sum_{i \in \mathcal{D}_{S,1}} w_0(X_i) h_\delta(Y_i^2 - f^*(X_i)) \mathbf{1}_{f^*(X_i) - \delta \leq Y_i^2 \leq f^*(X_i)} \\ &\leq \frac{1}{n_S/2} \sum_{i \in \mathcal{D}_{S,1}} w_0(X_i) \mathbf{1}_{f^*(X_i) - \delta \leq Y_i^2 \leq f^*(X_i)}, \end{aligned}$$

454 where the first equality follows from the fact that  $w_0(X) \mathbf{1}_{Y^2 > f^*(X)} = 0$  a.s. on the source do-  
455 main, the second equality follows from the fact that  $h_\delta(t) \mathbf{1}_{t < -\delta} = 0$  for all  $t$ , and the last in-  
456 equality follows from the fact that  $h_\delta(Y_i^2 - f^*(X_i)) \leq 1$  when  $Y_i^2 - f^*(X_i) \leq 0$ . Since  
457  $w_0(X) \mathbf{1}_{f^*(X) - \delta \leq Y^2 \leq f^*(X)} \leq W$ , by Hoeffding's inequality, we have with probability at least  
458  $1 - e^{-t}$ :

$$\begin{aligned} \frac{1}{n_S/2} \sum_{i \in \mathcal{D}_{S,1}} w_0(X_i) h_\delta(Y_i^2 - f^*(X_i)) &\leq \mathbb{E}_S [w_0(X) \mathbf{1}_{f^*(X) - \delta \leq Y^2 \leq f^*(X)}] + W \sqrt{\frac{t}{n_S}} \\ &= \mathbb{P}_T(f^*(X) - \delta \leq Y^2 \leq f^*(X)) + W \sqrt{\frac{t}{n_S}} \\ &\leq L\delta + W \sqrt{\frac{t}{n_S}}, \end{aligned}$$

459 where  $L$  is upper bound on the density of  $Y^2 - f^*(X)$ . Call this event  $\Omega_1$  that the above bound  
460 holds. At this event we have:

$$\begin{aligned} & \frac{1}{n_S/2} \sum_{i \in \mathcal{D}_{S,1}} \hat{w}(X_i) h_\delta(Y_i^2 - f^*(X_i)) \\ &= \frac{1}{n_S/2} \sum_{i \in \mathcal{D}_{S,1}} w_0(X_i) h_\delta(Y_i^2 - f^*(X_i)) + \frac{1}{n_S/2} \sum_{i \in \mathcal{D}_{S,1}} (\hat{w}(X_i) - w_0(X_i)) h_\delta(Y_i^2 - f^*(X_i)) \\ &\leq L\delta + W \sqrt{\frac{t}{n_S}} + \frac{B + \delta}{\delta} \cdot \frac{2}{n_S} \sum_{i=1}^{n_S/2} |\hat{w}(X_i) - w_0(X_i)|, \end{aligned}$$

461 where the last inequality follows from the fact that  $h_\delta(t) \leq (B + \delta)/\delta$  if  $t \leq B$ . Finally, to bound the  
462 last summand, we again apply Hoeffding's inequality. As  $\|\hat{w}\|_\infty \leq W'$ , we have with probability  
463 greater than or equal to  $1 - e^{-t}$ :

$$\frac{1}{n_S/2} \sum_{i=1}^{n_S/2} |\hat{w}(X_i) - w_0(X_i)| \leq \mathbb{E}_S [|\hat{w}(X) - w_0(X)|] + (W + W') \sqrt{\frac{t}{n_S}}.$$

464 If we denote the event  $\Omega_2$  where the above inequality holds, then on the event  $\Omega_1 \cap \Omega_2$ , we have:

$$\begin{aligned} & \frac{1}{n_S/2} \sum_i \hat{w}(X_i) h_\delta(Y_i^2 - f^*(X_i)) \\ &\leq L\delta + W \sqrt{\frac{t}{n_S}} + \frac{B + \delta}{\delta} \cdot \left( \mathbb{E}_S [|\hat{w}(X) - w_0(X)|] + (W + W') \sqrt{\frac{t}{n_S}} \right) \leq \epsilon. \end{aligned}$$

Furthermore,

$$\mathbb{P}(\Omega_1 \cap \Omega_2) \geq \mathbb{P}(\Omega_1) + \mathbb{P}(\Omega_2) - 1 \geq 1 - 2e^{-t}.$$

Therefore, we conclude that with probability  $\geq 1 - 2e^{-t}$ ,  $f^*$  is a feasible solution.

We now proof Theorem 2.2 on the event  $\Omega_1 \cap \Omega_2$ , when  $f^*$  is a feasible solution. Then we have,  $\mathbb{P}_{n,T}(\hat{f}_{\text{init}}(X)) \leq \mathbb{P}_{n,T}(f^*(X))$  on this event, by the optimality of  $\hat{f}_{\text{init}}$  in equation (3.5). Then we have:

$$\begin{aligned} \mathbb{E}_T[\hat{f}_{\text{init}}(X)] &= \mathbb{P}_{n_T}(\hat{f}_{\text{init}}(X)) + (\mathbb{P}_T - \mathbb{P}_{n_T})(\hat{f}_{\text{init}}(X)) \\ &\leq \mathbb{P}_{n_T}(f^*(X)) + (\mathbb{P}_T - \mathbb{P}_{n_T})(\hat{f}_{\text{init}}(X)) \\ &= \mathbb{E}_T[f^*(X)] + (\mathbb{P}_{n_T} - \mathbb{P}_T)(f^*(X) - \hat{f}_{\text{init}}(X)) \\ &\leq \mathbb{E}_T[f^*(X)] + \sup_{f \in \mathcal{F}} |(\mathbb{P}_{n_T} - \mathbb{P}_T)(f^*(X) - f(X))| \end{aligned}$$

Finally as  $f - f^*$  is upper bounded by  $F' = B_{\mathcal{F}} + \|f^*\|_{\infty}$  (as  $f$  is uniformly upper bounded by  $F$ ). Therefore, by Mcdiarmid's inequality, we with have with probability  $1 - e^{-t}$ :

$$\sup_{f \in \mathcal{F}} |(\mathbb{P}_{n_T} - \mathbb{P}_T)(f^*(X) - f(X))| \leq \mathbb{E}_T \left[ \sup_{f \in \mathcal{F}} |(\mathbb{P}_{n_T} - \mathbb{P}_T)(f^*(X) - f(X))| \right] + F' \sqrt{\frac{t}{2n_T}}.$$

Call this event  $\Omega_3$ . Furthermore, by standard symmetrization:

$$\mathbb{E}_T \left[ \sup_{f \in \mathcal{F}} |(\mathbb{P}_{n_T} - \mathbb{P}_T)(f^*(X) - f(X))| \right] \leq 2\mathcal{R}_{n_T}(\mathcal{F} - f^*),$$

where  $\mathcal{R}_{n_T}(\mathcal{F} - f^*)$  is the Rademacher complexity of  $\mathcal{F} - f^*$ . Therefore, on  $\cap_{i=1}^3 \Omega_i$ , we have:

$$\mathbb{E}_T[\hat{f}_{\text{init}}(X)] \leq \mathbb{E}_T[f^*(X)] + 2\mathcal{R}_{n_T}(\mathcal{F} - f^*) + F' \sqrt{\frac{t}{2n_T}},$$

and  $\mathbb{P}(\cap_{i=1}^3 \Omega_i) \geq 1 - 3e^{-t}$ . This completes the proof.

## A.2 Proof of Lemma 3.3

We prove the lemma into two steps; first we show that  $\hat{f}_{\text{init}}$  satisfies  $\mathbb{P}_T(Y^2 > \hat{f}_{\text{init}}(X)) \leq \tau$  with high probability for some small  $\tau$ . Next we argue that, on  $\mathcal{D}_{S,2}$ , we have  $(2/n_S) \cdot \sum_{i \in \mathcal{D}_{S,2}} \hat{w}(X_i) \mathbb{1}(Y_i^2 \geq \hat{f}_{\text{init}}(X_i)) \leq \tilde{\tau}$  with high probability for some small  $\tilde{\tau}$ . Then as long as  $\tilde{\tau} \leq \alpha$ , we conclude the proof of the lemma.

**Step 1:** Note that, by feasibility,  $\hat{f}_{\text{init}}$  satisfies:

$$\frac{1}{n_S/2} \sum_{i \in \mathcal{D}_{S,1}} \hat{w}(X_i) h_{\delta}(Y_i^2 - \hat{f}_{\text{init}}(X_i)) \leq \epsilon.$$

This implies:

$$\begin{aligned} &\mathbb{E}_T \left[ h_{\delta} \left( Y^2 - \hat{f}_{\text{init}}(X) \right) \right] \\ &= \mathbb{E}_S \left[ w_0(X) h_{\delta} \left( Y^2 - \hat{f}_{\text{init}}(X) \right) \right] \\ &= \frac{1}{n_S/2} \sum_{i \in \mathcal{D}_{S,1}} w_0(X_i) h_{\delta}(Y_i^2 - \hat{f}_{\text{init}}(X_i)) + (\mathbb{P}_S - \mathbb{P}_{n_S/2}) w_0(X) h_{\delta}(Y^2 - \hat{f}_{\text{init}}(X)) \\ &= \frac{1}{n_S/2} \sum_{i \in \mathcal{D}_{S,1}} \hat{w}(X_i) h_{\delta}(Y_i^2 - \hat{f}_{\text{init}}(X_i)) + \frac{1}{n_S/2} \sum_{i \in \mathcal{D}_{S,1}} (w_0(X_i) - \hat{w}(X_i)) h_{\delta}(Y_i^2 - \hat{f}_{\text{init}}(X_i)) \\ &\quad + (\mathbb{P}_S - \mathbb{P}_{n_S/2}) w_0(X) h_{\delta}(Y^2 - \hat{f}_{\text{init}}(X)) \\ &\leq \epsilon + \frac{B + \delta}{\delta} \|\hat{w} - w_0\|_{L_1(\mathbb{P}_{n_1,S})} + \sup_{f \in \mathcal{F}} |(\mathbb{P}_S - \mathbb{P}_{n_S/2}) w_0(X) h_{\delta}(Y^2 - f(X))| \end{aligned}$$



Now, as  $h_\delta(Y^2 - f(X)) \leq (B + \delta)/\delta$  and  $w_0 \leq W$ , we have by Mcdiarmid's inequality, with probability  $\geq 1 - e^{-t}$ :

$$\begin{aligned} & \sup_{f \in \mathcal{F}} |(\mathbb{P}_S - \mathbb{P}_{n_S/2}) w_0(X) h_\delta(Y^2 - f(X))| \\ & \leq \mathbb{E}_S \left[ \sup_{f \in \mathcal{F}} |(\mathbb{P}_S - \mathbb{P}_{n_S/2}) w_0(X) h_\delta(Y^2 - f(X))| \right] + W \frac{B + \delta}{\delta} \sqrt{\frac{t}{n_S}} \\ & \leq 2\mathcal{R}_{n_S/2, \mathcal{F}}(w_0 h_\delta \circ f) + W \frac{B + \delta}{\delta} \sqrt{\frac{t}{n_S}}. \end{aligned}$$

Meanwhile, as in the proof of Theorem 3.2, with probability  $\geq 1 - e^{-t}$ :

$$\|\hat{w} - w_0\|_{L_1(\mathbb{P}_{n_1, S})} \leq \mathbb{E}_S [|\hat{w}(X) - w(X)|] + (W + W') \sqrt{\frac{t}{n_S}}.$$

Choosing  $t = 10 \log n_S$  we obtain that with probability  $\geq 1 - 2n_S^{-10}$ :

$$\begin{aligned} & \mathbb{E}_T \left( h_\delta \left( Y_T^2 - \hat{f}_{\text{init}}(X_T) \right) \right) \\ & \leq \epsilon + \frac{B + \delta}{\delta} \left( \mathbb{E}_S [|\hat{w}(X) - w_0(X)|] + (W + W') \sqrt{\frac{10 \log n_S}{n_S}} \right) \\ & \quad + 2\mathcal{R}_{n_S/2, \mathcal{F}}(w_0 h_\delta \circ f) + W \frac{B + \delta}{\delta} \sqrt{\frac{10 \log n_S}{n_S}} \\ & \leq \epsilon + \frac{B + \delta}{\delta} \left( \mathbb{E}_S [|\hat{w}(X) - w_0(X)|] + (2W + W') \sqrt{\frac{10 \log n_S}{n_S}} \right) + 2\mathcal{R}_{n_S/2, \mathcal{F}}(w_0 h_\delta \circ f). \end{aligned}$$

We next bound the Rademacher complexity of  $\mathcal{R}_{n_S/2, \mathcal{F}}(w_0 h_\delta \circ f)$ . By symmetrization, we have with  $\zeta_1, \dots, \zeta_{n_S/2}$  i.i.d. Rademacher(1/2):

$$\begin{aligned} \mathcal{R}_{n_S/2, \mathcal{F}}(w_0 h_\delta \circ f) &= 2\mathbb{E}_S \left[ \sup_{f \in \mathcal{F}} \left| \frac{1}{n_S/2} \sum_i \zeta_i w_0(X_i) h_\delta(Y_i^2 - f(X_i)) \right| \right] \\ &= 2\mathbb{E}_S \left[ \sup_{f \in \mathcal{F}} \left| \frac{1}{n_S/2} \sum_i \zeta_i \phi(w_0(X_i), Y_i^2 - f(X_i)) \right| \right] \quad [\phi(x, y) = x h_\delta(y)] \end{aligned}$$

We first show that  $\phi : \mathbb{R}^2 \rightarrow \mathbb{R}$  is a Lipschitz function on its domain. The first argument of  $\phi$  is  $w_0(x)$  which lies within  $[-W, W]$ . The second argument of  $\phi$  is  $Y^2 - f(X)$  (on the source domain), which is bounded by  $B$ . Therefore,  $h_\delta(Y^2 - f(X))$  is bounded above by  $(B + \delta)/\delta$ . The derivative of  $h_\delta$  is 0 for  $x \leq -\delta$  and  $\delta$  for  $x \geq \delta$ . Hence, we have the following:

$$\|\nabla \phi(x, y)\| = \|(h_\delta(y) \quad x h'_\delta(y))\| \leq \sqrt{\frac{(B + \delta)^2}{\delta^2} + \frac{W^2}{\delta^2}} \leq \frac{B + W + \delta}{\delta}.$$

We next apply vector-valued Ledoux-Talagrand contraction inequality on the function  $\phi$  (equation (1) of Maurer (2016)), to obtain the following bound on the Rademacher complexity:

$$\begin{aligned} & 2\mathbb{E}_S \left[ \sup_{f \in \mathcal{F}} \left| \frac{1}{n_S/2} \sum_i \zeta_i \phi(w_0(X_i), Y_i^2 - f(X_i)) \right| \right] \\ & \leq 2\sqrt{2} \left( \frac{B + W + \delta}{\delta} \right) \mathbb{E}_S \left[ \sup_{f \in \mathcal{F}} \left| \frac{1}{n_S/2} \sum_i (\zeta_{i1} w_0(X_i) + \zeta_{i2} (Y_i^2 - f(X_i))) \right| \right] \\ & \leq 2\sqrt{2} \left( \frac{B + W + \delta}{\delta} \right) \left[ \mathbb{E}_S \left[ \left| \frac{1}{n_S/2} \sum_i \zeta_{i1} w_0(X_i) \right| \right] + \mathbb{E}_S \left[ \left| \frac{1}{n_S/2} \sum_{i \in \mathcal{D}_{S,1}} \zeta_{i,2} Y_i^2 \right| \right] \mathcal{R}_{n_S/2}(\mathcal{F}) \right] \\ & \leq 2\sqrt{2} \left( \frac{B + W + \delta}{\delta} \right) \left[ \frac{\|w_0\|_{L_2(P_{X_S})}}{\sqrt{n_S/2}} + \sqrt{\frac{\mathbb{E}_S[Y^4]}{n_S/2}} + \mathcal{R}_{n_S/2}(\mathcal{F}) \right] \end{aligned}$$

483 Using this, we obtain the following:

$$\begin{aligned}
& \mathbb{E}_T \left( h_\delta \left( Y^2 - \hat{f}_{\text{init}}(X) \right) \right) \\
& \leq \epsilon + \frac{B + \delta}{\delta} \left( \mathbb{E}_S [|\hat{w}(X) - w_0(X)|] + (2W + W') \sqrt{\frac{5 \log(n_S/2)}{n_S/2}} \right) \\
& \quad + 4\sqrt{2} \left( \frac{B + W + \delta}{\delta} \right) \left[ \frac{\|w_0\|_{L_2(P_{X_S})} + \sqrt{\mathbb{E}_S[Y^4]}}{\sqrt{n_S}} + \mathcal{R}_{n_S/2}(\mathcal{F}) \right] \\
& \leq \epsilon + 4\sqrt{2} \left( \frac{B + W + \delta}{\delta} \right) \left[ \mathbb{E} [|\hat{w}(X_S) - w(X_S)|] + (2W + W') \sqrt{\frac{5 \log(n_S/2)}{n_S/2}} \right. \\
& \quad \left. + \frac{\|w_0\|_{L_2(P_{X_S})} + \sqrt{\mathbb{E}_S[Y^4]}}{\sqrt{n_S/2}} + \mathcal{R}_{n_S/2}(\mathcal{F}) \right] \\
& \leq \epsilon + 4\sqrt{2} \left( \frac{B + W + \delta}{\delta} \right) \left[ \mathbb{E} [|\hat{w}(X_S) - w(X_S)|] + (2W + W') \sqrt{\frac{5 \log(n_S/2)}{n_S/2}} + \frac{W + \sqrt{\mathbb{E}_S[Y^4]}}{\sqrt{n_S/2}} + \mathcal{R}_{n_S/2}(\mathcal{F}) \right]
\end{aligned}$$

484 Choosing

$$\epsilon = L\delta + W \sqrt{\frac{5 \log(n_S/2)}{n_S/2}} + \frac{B + \delta}{\delta} \cdot \left( \mathbb{E}_S [|\hat{w}(X) - w_0(X)|] + (W + W') \sqrt{\frac{5 \log(n_S/2)}{n_S/2}} \right),$$

485 we obtain

$$\begin{aligned}
& \mathbb{E}_T \left( h_\delta \left( Y^2 - \hat{f}_{\text{init}}(X) \right) \right) \\
& \lesssim L\delta + \frac{B + W + \delta}{\delta} \cdot \left( \mathbb{E}_S [|\hat{w}(X) - w_0(X)|] + (W + W') \sqrt{\frac{5 \log n_S}{n_S}} + \mathcal{R}_{n_S/2}(\mathcal{F}) \right) \\
& \lesssim \sqrt{L(B + W) \left( \mathbb{E}_S [|\hat{w}(X) - w_0(X)|] + (W + W') \sqrt{\frac{5 \log n_S}{n_S}} + \mathcal{R}_{n_S/2}(\mathcal{F}) \right)} \\
& \quad + \left( \mathbb{E}_S [|\hat{w}(X) - w_0(X)|] + (W + W') \sqrt{\frac{5 \log n_S}{n_S}} + \mathcal{R}_{n_S/2}(\mathcal{F}) \right) \\
& \quad \quad \quad \text{(by choosing } \delta \text{ to balance the terms)} \\
& \triangleq \tau
\end{aligned}$$

Call the above event  $\Omega_1$ . This completes the proof of Step 1.

**Step 2:** Coming back to  $\mathcal{D}_{S,2}$ , we have:

$$\frac{1}{n_S/2} \sum_{i \in \mathcal{D}_{S,2}} \hat{w}(X_{S,i}) \mathbb{1}_{Y_i^2 > \hat{f}_{\text{init}}(X_i)} \leq \frac{1}{n_S/2} \sum_{i \in \mathcal{D}_{S,2}} |\hat{w}(X_i) - w_0(X_i)| + \frac{1}{n_S/2} \sum_{i \in \mathcal{D}_{S,2}} w_0(X_i) \mathbb{1}_{Y_i^2 > \hat{f}_{\text{init}}(X_i)}$$

486 Furthermore, by Hoeffding's inequality, we have with probability  $\geq 1 - e^{-t}$ :

$$\begin{aligned}
\frac{1}{n_S/2} \sum_{i \in \mathcal{D}_2} w_0(X_i) \mathbb{1}_{Y_i^2 > \hat{f}_{\text{init}}(X_i)} & \leq \mathbb{E}_S [w_0(X) \mathbb{1}_{Y^2 > \hat{f}_{\text{init}}(X)}] + W \sqrt{\frac{t}{n_S}} \\
& \leq \mathbb{E}_S [w_0(X) h_\delta (Y^2 - \hat{f}_{\text{init}}(X))] + W \sqrt{\frac{t}{n_S}} \\
& = \mathbb{E}_T \left( h_\delta \left( Y^2 - \hat{f}_{\text{init}}(X) \right) \right) + W \sqrt{\frac{t}{n_S}}
\end{aligned}$$

487 Meanwhile, with probability  $\geq 1 - e^{-t}$ :

$$\frac{1}{n_S/2} \sum_{i \in \mathcal{D}_{S,2}} |\hat{w}(X_i) - w_0(X_i)| \leq \mathbb{E}_S [|\hat{w}(X) - w_0(X)|] + (W + W') \sqrt{\frac{t}{n_S}}.$$

Therefore, with  $t = 10 \log n_S$ , we have with probability  $\geq 1 - 2n_S^{-10}$ :

$$\begin{aligned} \frac{1}{n_S/2} \sum_{i \in \mathcal{D}_{S,2}} \hat{w}(X_i) \mathbb{1}_{Y_i^2 > \hat{f}_{\text{init}}(X_i)} &\leq \mathbb{E}_S [|\hat{w}(X) - w_0(X)|] + (W + W') \sqrt{\frac{10 \log n_S}{n_S}} \\ &\quad + \mathbb{E}_T \left( h_\delta \left( Y^2 - \hat{f}_{\text{init}}(X) \right) \right) + W \sqrt{\frac{10 \log n_S}{n_S}}. \end{aligned}$$

Call this event  $\Omega_2$ . Therefore, on  $\Omega_1 \cap \Omega_2$  we have:

$$\frac{1}{n_S/2} \sum_{i \in \mathcal{D}_{S,2}} \hat{w}(X_i) \mathbb{1}_{Y_i^2 > \hat{f}_{\text{init}}(X_i)} \leq \mathbb{E}_S [|\hat{w}(X) - w_0(X)|] + (2W + W') \sqrt{\frac{10 \log n_S}{n_S}} + \tau \triangleq \tilde{\tau}.$$

This completes the proof of Step 2. For any fixed  $\alpha > 0$ , we have  $\tilde{\tau} \leq \alpha$  as long as  $n_S$  is large enough and  $\mathbb{E}_S [|\hat{w}(X) - w_0(X)|]$  is small enough, and as a consequence  $\hat{\lambda}(\alpha) \leq 1$ . This completes the proof.

### A.3 Proof of Theorem 3.4

Recall that we construct the prediction intervals using data splitting; from the first part of the data (namely  $\mathcal{D}_1$ ), we estimate  $\hat{f}_{\text{init}}$  and use the second part of the data (namely  $\mathcal{D}_2$ ) to estimate  $\hat{\lambda}(\alpha)$ . Conditional on  $\mathcal{D}_1$ , define a function class  $\mathcal{G} \equiv \mathcal{G}(\hat{f})$  as:

$$\mathcal{G} = \left\{ g_\lambda(x, y) = w_0(x) \mathbb{1}_{y^2 - \lambda \hat{f}_{\text{init}}(x) \geq 0} : \lambda \geq 0 \right\}.$$

As  $\mathcal{G}$  only depends on a scalar parameter  $\lambda$  (as  $w_0$  and  $\hat{f}_{\text{init}}$  are fixed conditionally on  $\mathcal{D}_{S,1}, \mathcal{D}_T$ ), it is a VC class of function with VC-dim  $\leq 2$ .

$$\begin{aligned} \mathbb{P}_T \left( Y^2 \geq \hat{\lambda}(\alpha) \hat{f}_{\text{init}}(X) \right) &= \mathbb{E}_S \left[ w_0(X) \mathbb{1}_{Y^2 - \hat{\lambda}(\alpha) \hat{f}_{\text{init}}(X) \geq 0} \right] \\ &= \frac{1}{n_S/2} \sum_{i \in \mathcal{D}_{S,2}} w_0(X_i) \mathbb{1}_{Y_i^2 - \hat{\lambda}(\alpha) \hat{f}_{\text{init}}(X_i)} + (\mathbb{P}_S - \mathbb{P}_{n_S/2}) w_0(X) \mathbb{1}_{Y^2 \geq \hat{\lambda}(\alpha) \hat{f}_{\text{init}}(X)} \\ &= \frac{1}{n_S/2} \sum_{i \in \mathcal{D}_{S,2}} \hat{w}(X_i) \mathbb{1}_{Y_i^2 - \hat{\lambda}(\alpha) \hat{f}_{\text{init}}(X_i) \geq 0} + \frac{1}{n_S/2} \sum_{i \in \mathcal{D}_{S,2}} (w_0(X_i) - \hat{w}(X_i)) \mathbb{1}_{Y_i^2 - \hat{\lambda}(\alpha) \hat{f}_{\text{init}}(X_i) \geq 0} \\ &\quad + (\mathbb{P}_S - \mathbb{P}_{n_S/2}) w_0(X) \mathbb{1}_{Y^2 - \hat{\lambda}(\alpha) \hat{f}_{\text{init}}(X) \geq 0} \end{aligned} \tag{A.1}$$

Now, by the definition of  $\hat{\lambda}(\alpha)$  (see Step 2), we have:

$$\alpha - \frac{1}{n_S/2} \sum_{i \in \mathcal{D}_{S,2}} \hat{w}(X_i) \mathbb{1}_{Y_i^2 - \hat{\lambda}(\alpha) \hat{f}_{\text{init}}(X_i) \geq 0} \leq \alpha.$$

We use a similar technique to control the second summand as in the proof of Theorem 3.2. By using the fact that the indicator function is less than one, we have:

$$\left| \frac{1}{n_S/2} \sum_{i \in \mathcal{D}_{S,2}} (w_0(X_i) - \hat{w}(X_i)) \mathbb{1}_{Y_i^2 - \hat{\lambda}(\alpha) \hat{f}_{\text{init}}(X_i) \geq 0} \right| \leq \frac{1}{n_S/2} \sum_{i \in \mathcal{D}_{S,2}} |\hat{w}(X_i) - w_0(X_i)|.$$

Applying Hoeffding's inequality (with the fact that  $\|\hat{w}\|_\infty \leq W'$  and  $\|w_0\|_\infty \leq W$ ), we have with probability greater than or equal to  $1 - e^{-t}$ :

$$\frac{1}{n_S/2} \sum_{i \in \mathcal{D}_{S,2}} |\hat{w}(X_i) - w_0(X_i)| \leq \mathbb{E}_S [|\hat{w}(X) - w_0(X)|] + (W + W') \sqrt{\frac{t}{n_S}}.$$

To control the third summand of (A.1), note that, conditional on  $\mathcal{D}_{S,1}$  and  $\mathcal{D}_T$  (i.e., assuming  $\hat{f}_{\text{init}}$  fixed), and using the fact that  $\|g\|_\infty \leq \|w_0\|_\infty \leq W$  for all  $g \in \mathcal{G}$ , we have by Mcdiarmid's

inequality with probability greater than or equal to  $1 - e^{-t}$ :

$$\begin{aligned} \sup_{g \in \mathcal{G}} |(\mathbb{P}_S - \mathbb{P}_{n_S/2})g(X, Y)| &\leq \mathbb{E}_S \left[ \sup_{g \in \mathcal{G}} |(\mathbb{P}_S - \mathbb{P}_{n_S/2})g(X, Y)| \mid \mathcal{D}_{S,1}, \mathcal{D}_T \right] + W \sqrt{\frac{t}{n_S}} \\ &\leq 2\mathcal{R}_{n_S/2}(\mathcal{G} \mid \mathcal{D}_{S,1}, \mathcal{D}_T) + W \sqrt{\frac{t}{n_S}}. \end{aligned}$$

Now conditional on  $\mathcal{D}_{S,1}, \mathcal{D}_T$ ,  $\mathcal{G}$  is a VC class of function with VC dimension  $\leq 2$ . Therefore,

$$\mathcal{R}_{n_S/2}(\mathcal{G} \mid \mathcal{D}_{S,1}, \mathcal{D}_T) \leq \sqrt{\frac{C}{n_S}}$$

for some constant  $C > 0$ . Thus, we have

$$\sup_{g \in \mathcal{G}} |(\mathbb{P}_S - \mathbb{P}_{n_S/2})g(X, Y)| \leq \sqrt{\frac{C}{n_S}} + W \sqrt{\frac{t}{n_S}}.$$

Combining the bounds, we have, with probability  $\geq 1 - 2e^{-t}$ :

$$\begin{aligned} &\left| \mathbb{P}_T \left( Y^2 > \hat{\lambda}(\alpha) \hat{f}_{\text{init}}(X) \right) - \alpha \right| \\ &\leq \frac{1}{n_S/2} + \mathbb{E}_S [|\hat{w}(X) - w_0(X)|] + (2W + W') \sqrt{\frac{t}{n_S}} + \sqrt{\frac{C}{n_S}}. \end{aligned}$$

This completes the proof.

#### A.4 Proof of Theorem 4.3

We start with the following decomposition:

$$\begin{aligned} \mathbb{E}_T[\hat{f}_{\text{init}} \circ \hat{T}_0(X)] &= \mathbb{E}_T[\hat{f}_{\text{init}} \circ T_0(X)] + \mathbb{E}_T[\hat{f}_{\text{init}} \circ \hat{T}_0(X) - \hat{f}_{\text{init}} \circ T_0(X)] \\ &= \mathbb{E}_S[\hat{f}_{\text{init}}(X)] + \mathbb{E}_T[\hat{f}_{\text{init}} \circ \hat{T}_0(X) - \hat{f}_{\text{init}} \circ T_0(X)] \\ &\leq \mathbb{E}_S[\hat{f}_{\text{init}}(X)] + L_{\mathcal{F}} \mathbb{E}_T[|\hat{T}_0(X) - T_0(X)|] \end{aligned}$$

where the second equation follows from the fact that when  $X \sim P_T$ , then  $T_0(X) \sim P_S$ , and the last line follows from the fact  $f \in \mathcal{F}$  is  $L_{\mathcal{F}}$  Lipschitz. A similar argument as in the proof of Theorem 3.5 (Fan et al., 2023) yields:

$$\mathbb{E}_S[\hat{f}_{\text{init}}(X)] \leq \Delta + 4\mathcal{R}_{n_S}(\mathcal{F}) + 4B_{\mathcal{F}} \sqrt{\frac{t}{2n_S}}.$$

with probability  $\geq 1 - e^{-t}$ . We then finish the proofs.

#### A.5 Proof of Lemma 4.4

By the definition of  $\hat{\lambda}(\alpha)$ , we have

$$\left\{ \hat{\lambda}(\alpha) \geq 1 \right\} \implies \left\{ \frac{1}{n_S/2} \sum_{i \in \mathcal{D}_{S,2}} \mathbb{1} \left( Y_i^2 \geq \hat{f}_{\text{init}}(X_i) + \delta \right) > \alpha \right\}.$$

Now by an application of Chernoff bound for binomial distribution, we have:

$$\mathbb{P} \left( \frac{1}{n_S/2} \sum_{i \in \mathcal{D}_{S,2}} \mathbb{1} \left( Y_i^2 \geq \hat{f}_{\text{init}}(X_i) + \delta \right) > \alpha \mid \mathcal{D}_{S,1}, \mathcal{D}_T \right) \leq e^{-\frac{(\alpha - p_{n_S})^2 n_S}{6p_{n_S}}}.$$

Hence, we have the following:

$$\mathbb{P}(\hat{\lambda}(\alpha) > 1 \mid \mathcal{D}_{S,1}, \mathcal{D}_T) \leq e^{-\frac{(\alpha - p_{n_S})^2 n_S}{6p_{n_S}}}.$$

510 We next establish the high probability bound on  $p_{n_S}$ . We define a function  $\ell_\delta(x)$  which is 1 when  
 511  $x \leq -\delta$ , 0 when  $x \geq 0$  and  $-x/\delta$  when  $-\delta \leq x \leq 0$ .

$$\begin{aligned}
 p_{n_S} &= \mathbb{E}_S \left[ \mathbb{1}_{Y^2 \geq \hat{f}_{\text{init}}(X) + \delta} \right] \leq \mathbb{E}_S \left[ \ell_\delta(\hat{f}_{\text{init}}(X) - Y^2) \right] \\
 &= \frac{1}{n_S/2} \sum_{i \in \mathcal{D}_{S,1}} \ell_\delta(\hat{f}_{\text{init}}(X_i) - Y_i^2) + (\mathbb{P}_{n_S/2} - \mathbb{P}_S) \ell_\delta(\hat{f}_{\text{init}}(X) - Y^2) \\
 &\leq \sup_{f \in \mathcal{F}} (\mathbb{P}_{n_S/2} - \mathbb{P}_S) \ell_\delta(f(X) - Y^2) \\
 &\leq \frac{4}{\delta} \left( \sqrt{\frac{\mathbb{E}_S[Y^4]}{n_S}} + \mathcal{R}_{n_S/2}(\mathcal{F}) \right) + \sqrt{\frac{t}{n_S}}.
 \end{aligned}$$

512 where the first inequality used  $\ell_\delta(x) \geq \mathbb{1}(x \leq -\delta)$ , second inequality uses the fact that sample aver-  
 513 age of  $\ell_\delta$  over  $\mathcal{D}_{S,1}$  is 0 by the definition of  $\hat{f}_{\text{init}}$ , third inequality uses Ledoux-Talagrand contraction  
 514 inequality observing that  $\ell_\delta$  is  $1/\delta$ -Lipschitz. This completes the proof.

## 515 A.6 Proof of Theorem 4.5

$$\begin{aligned}
 &\mathbb{P}_T \left( Y^2 \geq \hat{\lambda}(\alpha)(\hat{f}_{\text{init}} \circ \hat{T}_0(X) + \delta) \right) \\
 &= \mathbb{P}_T \left( Y^2 \geq \hat{\lambda}(\alpha)(\hat{f}_{\text{init}} \circ T_0(X) + \delta) \right) \\
 &\quad + \left| \mathbb{P}_T \left( Y^2 \geq \hat{\lambda}(\alpha)(\hat{f}_{\text{init}} \circ \hat{T}_0(X) + \delta) \right) - \mathbb{P}_T \left( Y^2 \geq \hat{\lambda}(\alpha)(\hat{f}_{\text{init}} \circ T_0(X) + \delta) \right) \right| \\
 &\triangleq T_1 + T_2. \tag{A.2}
 \end{aligned}$$

516 We start with analyzing the first term:

$$\begin{aligned}
 T_1 &= \mathbb{P}_T \left( Y^2 \geq \hat{\lambda}(\alpha)(\hat{f}_{\text{init}} \circ T_0(X) + \delta) \right) \\
 &= \int_{\mathcal{X}_T} \int_{\mathcal{Y}} \mathbb{1}_{y^2 \geq \hat{\lambda}(\alpha)(\hat{f}_{\text{init}}(T_0(x)) + \delta)} f_T(y \mid X_T = x) p_T(x) dy dx \\
 &= \int_{\mathcal{X}_T} \int_{\mathcal{Y}} \mathbb{1}_{y^2 \geq \hat{\lambda}(\alpha)(\hat{f}_{\text{init}}(T_0(x)) + \delta)} f_S(y \mid X_S = T_0(x)) p_T(x) dy dx \\
 &= \int_{\mathcal{X}_S} \int_{\mathcal{Y}} \mathbb{1}_{y^2 \geq \hat{\lambda}(\alpha)(\hat{f}_{\text{init}}(z) + \delta)} f_S(y \mid X_S = z) p_T(T_0^{-1}(z)) |\nabla T_0^{-1}(z)| dy dx \\
 &= \int_{\mathcal{X}_S} \int_{\mathcal{Y}} \mathbb{1}_{y^2 \geq \hat{\lambda}(\alpha)(\hat{f}_{\text{init}}(z) + \delta)} f_S(y \mid X_S = z) p_S(z) dy dx \\
 &= \mathbb{P}_S(Y^2 \geq \hat{\lambda}(\alpha)(\hat{f}_{\text{init}}(X) + \delta)).
 \end{aligned}$$

517 Therefore, we need a high probability upper bound on  $\mathbb{P}_S(Y^2 \geq \hat{\lambda}(\alpha)(\hat{f}_{\text{init}}(X) + \delta) \mid \mathcal{D}_S \cup \mathcal{D}_T)$ .  
 518 Towards that end, we start with the following expansion:

$$\begin{aligned}
 &\mathbb{P}_S \left( Y^2 \geq \hat{\lambda}(\alpha)(\hat{f}_{\text{init}}(X) + \delta) \mid \mathcal{D}_S \cup \mathcal{D}_T \right) \\
 &= \frac{1}{n_S/2} \sum_{i \in \mathcal{D}_{S,2}} \mathbb{1}_{Y_i^2 \geq \hat{\lambda}(\alpha)(\hat{f}_{\text{init}}(X_i) + \delta)} + (\mathbb{P}_{n_S/2} - \mathbb{P}_S) \mathbb{1}_{Y^2 \geq \hat{\lambda}(\alpha)(\hat{f}_{\text{init}}(X) + \delta)} \tag{A.3}
 \end{aligned}$$

Now, note that, by the definition of  $\hat{\lambda}(\alpha)$ , we have:

$$\alpha - \frac{1}{n_S/2} \leq \frac{1}{n_S/2} \sum_{i \in \mathcal{D}_{S,2}} \mathbb{1}_{Y_i^2 \geq \hat{\lambda}(\alpha)(\hat{f}_{\text{init}}(X_i) + \delta)} \leq \alpha.$$

To bound the second term in (A.3), we use:

$$\left| (\mathbb{P}_{n_S/2} - \mathbb{P}_S) \mathbb{1}_{Y^2 \geq \hat{\lambda}(\alpha)(\hat{f}_{\text{init}}(X) + \delta)} \right| \leq \sup_{\lambda \geq 0} \left| (\mathbb{P}_{n_S/2} - \mathbb{P}_S) \mathbb{1}_{Y^2 \geq \lambda(\hat{f}_{\text{init}}(X) + \delta)} \right| := \mathbf{Z}_n.$$



To bound the supremum we use standard techniques from the empirical process theory. Define a collection of functions  $\mathcal{G} = \left\{ \mathbb{1}_{Y^2 \geq \lambda(\hat{f}_{\text{init}}(X) + \delta)} : \lambda \geq 0 \right\}$ . Note that, here we condition on  $\mathcal{D}_{S,1}$ , so we treat  $\hat{f}_{\text{init}}$  as a constant function. For notational simplicity, suppose

$$\Psi_n = \mathbb{E}_S \left[ \sup_{\lambda \geq 0} \left| (\mathbb{P}_{n_S/2} - \mathbb{P}_S) \mathbb{1}_{Y^2 \geq \lambda(\hat{f}_{\text{init}}(X) + \delta)} \right| \mid \mathcal{D}_{S,1} \right] = \mathbb{E}_S \left[ \sup_{g \in \mathcal{G}} \left| (\mathbb{P}_{n_S/2} - \mathbb{P}_S) g(X, Y) \right| \mid \mathcal{D}_{S,1} \right].$$

519 As the functions in  $\mathcal{G}$  are uniformly bounded by 1 (and consequently,  $\mathbb{E}[g^2(X, Y)] \leq 1$ ), we have  
 520 by Talagrand's concentration inequality of the suprema of the empirical process:

$$\mathbb{P} \left( \mathbf{Z}_n \geq \Psi_n + \sqrt{2t \frac{1 + 4\Psi_n}{n_S}} + \frac{4t}{3n_S} \mid \mathcal{D}_{S,1} \right) \leq e^{-t}. \quad (\text{A.4})$$

Therefore, we need an upper bound on  $\Psi_n$  to obtain a high probability upper bound on  $\mathbf{Z}_n$ . Towards that end, observe that  $\mathcal{G}$  is a VC class with VC-dim less than or equal to 2 (as it is an indicator function of a collection of functions with one parameter). Hence, we have, by symmetrization and Dudley's metric entropy bound:

$$\Psi_n \leq 2\mathbb{E}_S \left[ \sup_{g \in \mathcal{G}} \left| \frac{1}{n_S/2} \sum_{i \in \mathcal{D}_{S,2}} \epsilon_i g(X_i, Y_i) \right| \mid \mathcal{D}_{S,1} \right] \leq \frac{C}{\sqrt{n_S}}.$$

Therefore, going back to (A.4), we have with probability  $\geq 1 - e^{-t}$

$$\mathbf{Z}_n \leq \frac{C}{\sqrt{n_S}} + \sqrt{\frac{C_1}{n_S} + \frac{C_2}{n_S^{3/2}}} \sqrt{t} + \frac{4t}{3n_S}.$$

Hence, we have:

$$\left| \mathbb{P}_S \left( Y^2 \geq \hat{\lambda}(\alpha)(\hat{f}_{\text{init}}(X) + \delta) \mid \mathcal{D}_S \cup \mathcal{D}_T \right) - \alpha \right| \lesssim \sqrt{\frac{t}{n_S}}$$

521 with probability  $\geq 1 - e^{-t}$ . This completes the proof of  $T_1$ . To obtain a bound on  $T_2$ , note that:

$$\begin{aligned} T_2 &= \left| \mathbb{P}_T \left( Y^2 \geq \hat{\lambda}(\alpha)(\hat{f}_{\text{init}} \circ \hat{T}_0(X) + \delta) \right) - \mathbb{P}_T \left( Y^2 \geq \hat{\lambda}(\alpha)(\hat{f}_{\text{init}} \circ T_0(X) + \delta) \right) \right| \\ &= \left| \int_{\mathcal{X}_T} \left( \mathbb{P}_T(Y^2 \leq \hat{\lambda}(\alpha)(\hat{f}_{\text{init}}(\hat{T}_0(x)) + \delta) \mid X_T = x) \right. \right. \\ &\quad \left. \left. - \mathbb{P}_T(Y^2 \leq \hat{\lambda}(\alpha)(\hat{f}_{\text{init}}(T_0(x)) + \delta) \mid X_T = x) \right) p_T(x) dx \right| \\ &= \left| \int_{\mathcal{X}_T} \left( F_{Y_T^2|X_T=x}(\hat{\lambda}(\alpha)(\hat{f}_{\text{init}}(\hat{T}_0(x)) + \delta)) - F_{Y_T^2|X_T=x}(\hat{\lambda}(\alpha)(\hat{f}_{\text{init}}(T_0(x)) + \delta)) \right) p_T(x) dx \right| \\ &\leq G \int_{\mathcal{X}_T} \left| \hat{f}_{\text{init}}(T_0(x)) - \hat{f}_{\text{init}}(\hat{T}_0(x)) \right| p_T(x) dx \\ &\leq GL_{\mathcal{F}} \mathbb{E}_T[|T_0(X) - \hat{T}_0(X)|]. \end{aligned}$$

522 Here, the penultimate inequality uses the fact that the conditional distribution of  $Y_T^2$  given  $X_T$  is  
 523 Lipschitz (as the density of  $Y_T^2$  given  $X_T$  is bounded), and the last inequality uses the fact that  $\hat{f}_{\text{init}}$   
 524 is Lipschitz as we have assumed all functions in  $\mathcal{F}$  are Lipschitz.

## 525 B Details of the experiment

### 526 B.1 Density ratio estimation via probabilistic classification

527 Suppose we observe  $\{X_1, \dots, X_{n_1}\}$  from a distribution  $P$  (with density  $p$ ) and  
 528  $\{X_{n_1+1}, \dots, X_{n_1+n_2}\}$  from another distribution  $Q$  (with density  $q$ ). We are interested in es-  
 529 timating  $w_0(x) = q(x)/p(x)$ , where we assume  $Q$  is absolutely continuous with respect to  $P$

(otherwise, the density ratio can be unbounded with positive probability). Define,  $n_1 + n_2$  many binary random variables  $\{C_1, \dots, C_{n_1+n_2}\}$  such that  $C_i = 0$  for  $1 \leq i \leq n_1$  and  $C_i = 1$  for  $n_1 + 1 \leq i \leq n_1 + n_2$ . Consider the augmented dataset  $\mathcal{D} = \{(X_i, C_i)\}_{1 \leq i \leq n_1+n_2}$ . We can think that this dataset is generated from a mixture distribution  $\rho p(X) + (1 - \rho)q(x)$  where  $\rho = \mathbb{P}(C = 1)$ . For this mixture distribution, the posterior distribution of  $C$  given  $X$  is:

$$\begin{aligned} \mathbb{P}(C = 1 | X = x) &= \frac{P(X = x | C = 1)P(C = 1)}{P(X = x | C = 1)P(C = 1) + P(X = x | C = 0)P(C = 0)} \\ &= \frac{\rho q(x)}{\rho q(x) + (1 - \rho)p(x)} \\ &= \frac{(\rho/(1 - \rho))w_0(x)}{(\rho/(1 - \rho))w_0(x) + 1} \end{aligned}$$

This implies:

$$w_0(x) = \frac{1 - \rho}{\rho} \frac{\mathbb{P}(C = 1 | X = x)}{1 - \mathbb{P}(C = 1 | X = x)}.$$

Now, from the data, we can estimate  $\hat{\rho} = n_2/(n_1 + n_2)$  and  $\mathbb{P}(C = 1 | X = x)$  by any classification technique (e.g., using logistic regression, boosting, random forest, deep neural networks etc). Let  $\hat{g}(x)$  be one such classifier. Then we can estimate  $w_0(x)$  by  $(n_1/n_2)(\hat{g}(x)/(1 - \hat{g}(x)))$ .

## B.2 General weighted conformal prediction

The weighted conformal prediction method, as presented in [Tibshirani et al. \(2019\)](#), consists of two main steps:

1. Split the source data into parts; estimate the conditional mean function  $\mathbb{E}[Y | X = x]$ , say  $\hat{\mu}(x)$  using the first part of the source data.
2. Use the second part of the source data and the target data to construct weight  $w(X_i)$  and the score function  $S(x, y) = |y - \hat{\mu}(x)|$  to construct the confidence interval.

In Section 5, we have implemented a generalized version of it, where we modify the score function as follows:

1. We estimate the conditional standard deviation function  $\sqrt{\text{var}(Y | X = x)}$  along with the conditional mean function from the first part of the data. Call it  $\hat{\sigma}(x)$ .
2. We use the modified score function  $s(x, y) = |y - \hat{\mu}(x)|/\hat{\sigma}(x)$ .

The rest of the method is the same as [Tibshirani et al. \(2019\)](#). This additional estimated conditional variance function allows more expressivity and flexibility to the conformal prediction band, as observed in Section 5.2 of [Lei et al. \(2018\)](#), as this captures the local heterogeneity of the conditional distribution of  $Y$  given  $X$ .

## B.3 Boxplots to compare coverage and bandwidth

In this subsection, we present two boxplots to compare the variation in coverage and average width of the prediction bands between our method and the generalized weighted conformal prediction (as described in the previous subsection).

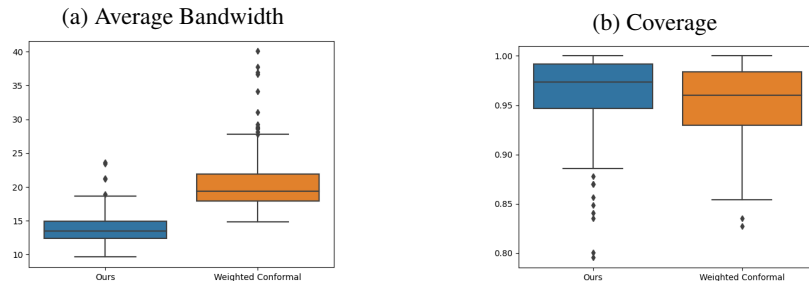

558 The boxplots immediately show that our methods yield similar coverage (even with lesser vari-  
559 ability) with significantly lower average width than the generalized weighted conformal prediction  
560 method.

## NeurIPS Paper Checklist

### 1. Claims

Question: Do the main claims made in the abstract and introduction accurately reflect the paper’s contributions and scope?

Answer: [Yes]

Justification: See Section 3, 4 and 5.

Guidelines:

- The answer NA means that the abstract and introduction do not include the claims made in the paper.
- The abstract and/or introduction should clearly state the claims made, including the contributions made in the paper and important assumptions and limitations. A No or NA answer to this question will not be perceived well by the reviewers.
- The claims made should match theoretical and experimental results, and reflect how much the results can be expected to generalize to other settings.
- It is fine to include aspirational goals as motivation as long as it is clear that these goals are not attained by the paper.

### 2. Limitations

Question: Does the paper discuss the limitations of the work performed by the authors?

Answer: [No]

Justification: We have proposed a method for aggregating prediction intervals along with theoretical guarantees and experiments in this paper. Our theory is valid under certain assumptions clearly mentioned in the main paper. One limitation of the theory is that we do not know the performance of our method if the assumptions are violated, as is true for any theory of methods. Furthermore, one needs to verify the methodology on various real datasets to under the applicability of our method, which is outside the scope of this paper. As these are quite standard limitations, we refrain from including them in the main draft. However, if the referees feel that this should be included in the main draft, we would be happy to oblige.

Guidelines:

- The answer NA means that the paper has no limitation while the answer No means that the paper has limitations, but those are not discussed in the paper.
- The authors are encouraged to create a separate "Limitations" section in their paper.
- The paper should point out any strong assumptions and how robust the results are to violations of these assumptions (e.g., independence assumptions, noiseless settings, model well-specification, asymptotic approximations only holding locally). The authors should reflect on how these assumptions might be violated in practice and what the implications would be.
- The authors should reflect on the scope of the claims made, e.g., if the approach was only tested on a few datasets or with a few runs. In general, empirical results often depend on implicit assumptions, which should be articulated.
- The authors should reflect on the factors that influence the performance of the approach. For example, a facial recognition algorithm may perform poorly when image resolution is low or images are taken in low lighting. Or a speech-to-text system might not be used reliably to provide closed captions for online lectures because it fails to handle technical jargon.
- The authors should discuss the computational efficiency of the proposed algorithms and how they scale with dataset size.
- If applicable, the authors should discuss possible limitations of their approach to address problems of privacy and fairness.
- While the authors might fear that complete honesty about limitations might be used by reviewers as grounds for rejection, a worse outcome might be that reviewers discover limitations that aren’t acknowledged in the paper. The authors should use their best

judgment and recognize that individual actions in favor of transparency play an important role in developing norms that preserve the integrity of the community. Reviewers will be specifically instructed to not penalize honesty concerning limitations.

### 3. Theory Assumptions and Proofs

Question: For each theoretical result, does the paper provide the full set of assumptions and a complete (and correct) proof?

Answer: [Yes]

Justification: See Appendix A.

Guidelines:

- The answer NA means that the paper does not include theoretical results.
- All the theorems, formulas, and proofs in the paper should be numbered and cross-referenced.
- All assumptions should be clearly stated or referenced in the statement of any theorems.
- The proofs can either appear in the main paper or the supplemental material, but if they appear in the supplemental material, the authors are encouraged to provide a short proof sketch to provide intuition.
- Inversely, any informal proof provided in the core of the paper should be complemented by formal proofs provided in appendix or supplemental material.
- Theorems and Lemmas that the proof relies upon should be properly referenced.

### 4. Experimental Result Reproducibility

Question: Does the paper fully disclose all the information needed to reproduce the main experimental results of the paper to the extent that it affects the main claims and/or conclusions of the paper (regardless of whether the code and data are provided or not)?

Answer: [Yes]

Justification: See Section 5.

Guidelines:

- The answer NA means that the paper does not include experiments.
- If the paper includes experiments, a No answer to this question will not be perceived well by the reviewers: Making the paper reproducible is important, regardless of whether the code and data are provided or not.
- If the contribution is a dataset and/or model, the authors should describe the steps taken to make their results reproducible or verifiable.
- Depending on the contribution, reproducibility can be accomplished in various ways. For example, if the contribution is a novel architecture, describing the architecture fully might suffice, or if the contribution is a specific model and empirical evaluation, it may be necessary to either make it possible for others to replicate the model with the same dataset, or provide access to the model. In general, releasing code and data is often one good way to accomplish this, but reproducibility can also be provided via detailed instructions for how to replicate the results, access to a hosted model (e.g., in the case of a large language model), releasing of a model checkpoint, or other means that are appropriate to the research performed.
- While NeurIPS does not require releasing code, the conference does require all submissions to provide some reasonable avenue for reproducibility, which may depend on the nature of the contribution. For example
  - (a) If the contribution is primarily a new algorithm, the paper should make it clear how to reproduce that algorithm.
  - (b) If the contribution is primarily a new model architecture, the paper should describe the architecture clearly and fully.
  - (c) If the contribution is a new model (e.g., a large language model), then there should either be a way to access this model for reproducing the results or a way to reproduce the model (e.g., with an open-source dataset or instructions for how to construct the dataset).



- (d) We recognize that reproducibility may be tricky in some cases, in which case authors are welcome to describe the particular way they provide for reproducibility. In the case of closed-source models, it may be that access to the model is limited in some way (e.g., to registered users), but it should be possible for other researchers to have some path to reproducing or verifying the results.

## 5. Open access to data and code

Question: Does the paper provide open access to the data and code, with sufficient instructions to faithfully reproduce the main experimental results, as described in supplemental material?

Answer: [Yes]

Justification: See Section 5.

Guidelines:

- The answer NA means that paper does not include experiments requiring code.
- Please see the NeurIPS code and data submission guidelines (<https://nips.cc/public/guides/CodeSubmissionPolicy>) for more details.
- While we encourage the release of code and data, we understand that this might not be possible, so “No” is an acceptable answer. Papers cannot be rejected simply for not including code, unless this is central to the contribution (e.g., for a new open-source benchmark).
- The instructions should contain the exact command and environment needed to run to reproduce the results. See the NeurIPS code and data submission guidelines (<https://nips.cc/public/guides/CodeSubmissionPolicy>) for more details.
- The authors should provide instructions on data access and preparation, including how to access the raw data, preprocessed data, intermediate data, and generated data, etc.
- The authors should provide scripts to reproduce all experimental results for the new proposed method and baselines. If only a subset of experiments are reproducible, they should state which ones are omitted from the script and why.
- At submission time, to preserve anonymity, the authors should release anonymized versions (if applicable).
- Providing as much information as possible in supplemental material (appended to the paper) is recommended, but including URLs to data and code is permitted.

## 6. Experimental Setting/Details

Question: Does the paper specify all the training and test details (e.g., data splits, hyperparameters, how they were chosen, type of optimizer, etc.) necessary to understand the results?

Answer: [Yes]

Justification: See Section 5.

Guidelines:

- The answer NA means that the paper does not include experiments.
- The experimental setting should be presented in the core of the paper to a level of detail that is necessary to appreciate the results and make sense of them.
- The full details can be provided either with the code, in appendix, or as supplemental material.

## 7. Experiment Statistical Significance

Question: Does the paper report error bars suitably and correctly defined or other appropriate information about the statistical significance of the experiments?

Answer: [Yes]

Justification: See Section 5.

Guidelines:

- The answer NA means that the paper does not include experiments.

- The authors should answer “Yes” if the results are accompanied by error bars, confidence intervals, or statistical significance tests, at least for the experiments that support the main claims of the paper.
- The factors of variability that the error bars are capturing should be clearly stated (for example, train/test split, initialization, random drawing of some parameter, or overall run with given experimental conditions).
- The method for calculating the error bars should be explained (closed form formula, call to a library function, bootstrap, etc.)
- The assumptions made should be given (e.g., Normally distributed errors).
- It should be clear whether the error bar is the standard deviation or the standard error of the mean.
- It is OK to report 1-sigma error bars, but one should state it. The authors should preferably report a 2-sigma error bar than state that they have a 96% CI, if the hypothesis of Normality of errors is not verified.
- For asymmetric distributions, the authors should be careful not to show in tables or figures symmetric error bars that would yield results that are out of range (e.g. negative error rates).
- If error bars are reported in tables or plots, The authors should explain in the text how they were calculated and reference the corresponding figures or tables in the text.

## 8. Experiments Compute Resources

Question: For each experiment, does the paper provide sufficient information on the computer resources (type of compute workers, memory, time of execution) needed to reproduce the experiments?

Answer: [No]

Justification: Both methods in the experiment took approximately 10 minutes to run on a MacBook Pro laptop (with M2 Max CPU, 10 Cores, 32 GB RAM, and no GPU).

Guidelines:

- The answer NA means that the paper does not include experiments.
- The paper should indicate the type of compute workers CPU or GPU, internal cluster, or cloud provider, including relevant memory and storage.
- The paper should provide the amount of compute required for each of the individual experimental runs as well as estimate the total compute.
- The paper should disclose whether the full research project required more compute than the experiments reported in the paper (e.g., preliminary or failed experiments that didn’t make it into the paper).

## 9. Code Of Ethics

Question: Does the research conducted in the paper conform, in every respect, with the NeurIPS Code of Ethics <https://neurips.cc/public/EthicsGuidelines>?

Answer: [Yes]

Justification:

Guidelines:

- The answer NA means that the authors have not reviewed the NeurIPS Code of Ethics.
- If the authors answer No, they should explain the special circumstances that require a deviation from the Code of Ethics.
- The authors should make sure to preserve anonymity (e.g., if there is a special consideration due to laws or regulations in their jurisdiction).

## 10. Broader Impacts

Question: Does the paper discuss both potential positive societal impacts and negative societal impacts of the work performed?

Answer: [NA]

Justification: This paper presents work whose goal is to advance the field of Machine Learning. There are many potential societal consequences of our work, none which we feel must be specifically highlighted here.

Guidelines:

- The answer NA means that there is no societal impact of the work performed.
- If the authors answer NA or No, they should explain why their work has no societal impact or why the paper does not address societal impact.
- Examples of negative societal impacts include potential malicious or unintended uses (e.g., disinformation, generating fake profiles, surveillance), fairness considerations (e.g., deployment of technologies that could make decisions that unfairly impact specific groups), privacy considerations, and security considerations.
- The conference expects that many papers will be foundational research and not tied to particular applications, let alone deployments. However, if there is a direct path to any negative applications, the authors should point it out. For example, it is legitimate to point out that an improvement in the quality of generative models could be used to generate deepfakes for disinformation. On the other hand, it is not needed to point out that a generic algorithm for optimizing neural networks could enable people to train models that generate Deepfakes faster.
- The authors should consider possible harms that could arise when the technology is being used as intended and functioning correctly, harms that could arise when the technology is being used as intended but gives incorrect results, and harms following from (intentional or unintentional) misuse of the technology.
- If there are negative societal impacts, the authors could also discuss possible mitigation strategies (e.g., gated release of models, providing defenses in addition to attacks, mechanisms for monitoring misuse, mechanisms to monitor how a system learns from feedback over time, improving the efficiency and accessibility of ML).

## 11. Safeguards

Question: Does the paper describe safeguards that have been put in place for responsible release of data or models that have a high risk for misuse (e.g., pretrained language models, image generators, or scraped datasets)?

Answer: [NA]

Justification:

Guidelines:

- The answer NA means that the paper poses no such risks.
- Released models that have a high risk for misuse or dual-use should be released with necessary safeguards to allow for controlled use of the model, for example by requiring that users adhere to usage guidelines or restrictions to access the model or implementing safety filters.
- Datasets that have been scraped from the Internet could pose safety risks. The authors should describe how they avoided releasing unsafe images.
- We recognize that providing effective safeguards is challenging, and many papers do not require this, but we encourage authors to take this into account and make a best faith effort.

## 12. Licenses for existing assets

Question: Are the creators or original owners of assets (e.g., code, data, models), used in the paper, properly credited and are the license and terms of use explicitly mentioned and properly respected?

Answer: [Yes]

Justification: See Section 5.

Guidelines:

- The answer NA means that the paper does not use existing assets.
- The authors should cite the original paper that produced the code package or dataset.

- The authors should state which version of the asset is used and, if possible, include a URL.
- The name of the license (e.g., CC-BY 4.0) should be included for each asset.
- For scraped data from a particular source (e.g., website), the copyright and terms of service of that source should be provided.
- If assets are released, the license, copyright information, and terms of use in the package should be provided. For popular datasets, [paperswithcode.com/datasets](https://paperswithcode.com/datasets) has curated licenses for some datasets. Their licensing guide can help determine the license of a dataset.
- For existing datasets that are re-packaged, both the original license and the license of the derived asset (if it has changed) should be provided.
- If this information is not available online, the authors are encouraged to reach out to the asset's creators.

### 13. New Assets

Question: Are new assets introduced in the paper well documented and is the documentation provided alongside the assets?

Answer: [NA]

Justification:

Guidelines:

- The answer NA means that the paper does not release new assets.
- Researchers should communicate the details of the dataset/code/model as part of their submissions via structured templates. This includes details about training, license, limitations, etc.
- The paper should discuss whether and how consent was obtained from people whose asset is used.
- At submission time, remember to anonymize your assets (if applicable). You can either create an anonymized URL or include an anonymized zip file.

### 14. Crowdsourcing and Research with Human Subjects

Question: For crowdsourcing experiments and research with human subjects, does the paper include the full text of instructions given to participants and screenshots, if applicable, as well as details about compensation (if any)?

Answer: [NA]

Justification:

Guidelines:

- The answer NA means that the paper does not involve crowdsourcing nor research with human subjects.
- Including this information in the supplemental material is fine, but if the main contribution of the paper involves human subjects, then as much detail as possible should be included in the main paper.
- According to the NeurIPS Code of Ethics, workers involved in data collection, curation, or other labor should be paid at least the minimum wage in the country of the data collector.

### 15. Institutional Review Board (IRB) Approvals or Equivalent for Research with Human Subjects

Question: Does the paper describe potential risks incurred by study participants, whether such risks were disclosed to the subjects, and whether Institutional Review Board (IRB) approvals (or an equivalent approval/review based on the requirements of your country or institution) were obtained?

Answer: [NA]

Justification:

Guidelines:

- 869 • The answer NA means that the paper does not involve crowdsourcing nor research  
870 with human subjects.
- 871 • Depending on the country in which research is conducted, IRB approval (or equiva-  
872 lent) may be required for any human subjects research. If you obtained IRB approval,  
873 you should clearly state this in the paper.
- 874 • We recognize that the procedures for this may vary significantly between institutions  
875 and locations, and we expect authors to adhere to the NeurIPS Code of Ethics and the  
876 guidelines for their institution.
- 877 • For initial submissions, do not include any information that would break anonymity  
878 (if applicable), such as the institution conducting the review.
